# Supplementary material for: Low Water Stage Marks on Hunger Stones: Verification for the Elbe River in 1616–2015
Source: Copernicus journal article supplement (doi:10.5194/cp-2019-113), 2019-11-07
Supplement: Supplementary file [file cp-2019-113-AC2-supplement.pdf]

# Low Water Stage Marks on Hunger Stones: Verification for the Elbe River from 1616 to 2015

Libor Elleder<sup>1</sup>, Ladislav Kašpárek<sup>2</sup>, Jolana Šírová,<sup>3</sup> and Tomáš Kabelka.<sup>4</sup>

<sup>1</sup> Applied Hydrological Research Department, Czech Hydrometeorological Institute, Prague, Czech Republic.

<sup>2</sup> T. G. Masaryk Water Research Institute, p. r. i., Department of Hydrology, Prague, Czech Republic.

<sup>3</sup> Hydrological Database and Water Balance, Czech Hydrometeorological Institute, Prague, Czech Republic.

<sup>4</sup> Prague Regional Office, Department of Hydrology, Czech Hydrometeorological Institute, Prague, Czech Republic.

*Correspondence to:* Libor Elleder ([libor.elleder@chmi.cz](mailto:libor.elleder@chmi.cz))

in case of problems, send an email to [tomas.kabelka@chmi.cz](mailto:tomas.kabelka@chmi.cz)

Colours **rew1**, **rew2** denote corrections by two reviewers

## Abstract

This paper deals with the issue of documenting hydrological drought with the help of drought marks (DMs) which have been preserved on dozens of hunger stones in the river channel of the Elbe in Bohemia and Saxony. So far, the hunger stones have been regarded rather as an illustration of dry seasons. Our aim was, among other issues, to draw attention to the much greater value of hunger stones and individual dry year marks inscribed on them. Therefore, we wanted to verify their reliability and better understand the motivation of their authors. For this purpose, we used the current extreme drought period of 2014-2019, which allowed detailed documentation of a hunger stone in Děčín with marks dating from 1536 to 2003. Thanks to the helpful position of the **stones relative to** the water gauge, we could compare the measured mark heights to the corresponding water levels. Simultaneously, we have scanned the objects into 3D format so that it is possible to perform a detailed inspection of all the marks, even those that were overlooked during the field survey. A review of scientific and technical literature from the 19<sup>th</sup> century showed that the marks of low water levels on stones and rock outcrops were to some extent interconnected with other important points. They were linked to zero points of water gauges, initially set up for navigation purposes, and to flood marks. The particular situation in Děčín is therefore a unique example of the epigraphic indication of low and high water levels in the enclosing profile of the upper part of the Elbe river basin. **To verify the low water level marks or drought marks (DM) we used the then current scientific studies focussing on dry periods. However, we also used the oldest series of daily water levels measured in Magdeburg, Dresden and Prague, available from 1851, i.e. the beginning of measurements in Děčín. These series had to be reconstructed or digitised from CHMI archive sources. Since 1851 we have been able to accurately identify the heights and sometimes even the specific days when the minima were marked.**

**After a thorough field examination and newly measured data, coupled with data obtained from a review of older literature presenting the first surveys of marks on hunger stones as presented in 1842, older marks of low water levels can be considered as a reliable indication of the annual water level minima. The aim of the mark creators was not to make commemorative inscriptions of droughts, but to register the exact minimum water level. Deviations between the marks and the water gauge records did not exceed 4 cm, in the worse case the water level was 8 cm and only exceptionally was the disparity greater.**

**From the material obtained so far, an overall slightly decreasing trend of water level minima since the end of the 18<sup>th</sup> century is noticeable. The view on minima of the 17<sup>th</sup> and 16<sup>th</sup> centuries is based on**

47 only a few items of data and it is difficult to generalise. However, the minima obtained are comparable  
48 to or lower than the data from the critical dry periods of 1842 and 1858 to 1874. Our verification of  
49 low water level marks should be an incentive to process all available epigraphic documents of this  
50 kind in the near future in closer cooperation with colleagues from Saxony. The potential of these  
51 objects offers a deeper knowledge of periods of hydrological drought and possibly morphological  
52 changes in the Elbe riverbed.

## 53 1. Introduction 54

55 In recent years, the phenomenon of drought has become the most prominent manifestation of climate  
56 change in Central Europe. However, objective evaluation and assessment of its extremity is  
57 challenging, due to difficulty in describing the phenomenon of drought and the varying impacts of it.  
58 Drought, along with floods, ranks among the most commonly evaluated hydrological extremes. While  
59 a flood is caused by an unexpected and short-term excess of water that causes damage, hydrological  
60 drought follows a long-term deepening of water scarcity.

61 Our contribution is focused on hydrological drought, more precisely on the minima of low levels. Low  
62 water level and flow rates after long periods of precipitation deficit represent particularly valuable  
63 information about catchment hydrology.

64

65 Therefore, they also report on the base-flow, the groundwater accumulation, long-term depletion and  
66 hydrological drought propagation (van Loon, 2015). The minimum water level or flow is, to a large  
67 extent, summary information on the status of a given river basin.

68 Like floods, hydrological drought is difficult to study without an examination of historical events.  
69 However, what options do we have regarding low water levels? The available hydrological series  
70 usually cover no more than 150 years. The longest hydrological series of measurements in Cairo, A.D.  
71 622- A.D. 1933, representing 1,311 years of Nile observation (Shanin, 1985), was used to assess  
72 drought and its interrelations with phenomena such as El Niño. In Europe, the longest continuous  
73 series comprising measurements of water levels, in Magdeburg, started in 1727 (see the following  
74 text), and the measurements in Paris started in 1731 (Delametherie, 1800). However, it is impossible  
75 to conceal another complication, namely that systematic hydrometric measurements have, for the most  
76 part only been available since the end of the 19<sup>th</sup> century. Stable profiles where we can assume the  
77 validity of the rating curve as far back as possible are very valuable. Systematic series of water stages  
78 are, therefore testimony on runoff fluctuations, but partly also on changes in the stream cross-section  
79 and the catchment, both natural and anthropogenic.

80

81

82 Studies that focus on the identification of past dry periods and possibly on the wider context within  
83 NAO, ENSO oscillations are based mostly on an analysis of precipitation deficit or indicators that  
84 include temperature and hence loss by evaporation (e.g. Mikšovský et al., 2019). They are necessarily  
85 based on previous reconstructions of temperatures and precipitation based on an analysis of  
86 documentary sources. However, if we want to describe how the rainfall deficits and other weather  
87 influences were reflected in the runoff from the surveyed river basin, the options we have so far are  
88 rather limited.

89

90 Based on the available series of daily flow rates in Děčín (1851-2015), Brazdil et al. (2015) referred to  
91 a period of low flows between 1858 and 1875.

92 With the help of deficit volume analysis with a fixed annual ( $Q_{95}$ ) and variable monthly threshold  
93 ( $Q_{95m}$ ), Brazdil et al. (2015) identified the drought events of 1868 and 1874 as comparable to the 1904,  
94 1911 and 1947 dry periods.

95 The authors elaborated in detail the selected dry years of 1808, 1809, 1811, 1826, 1834, 1842, 1863,  
96 1868, 1904, 1911, 1921, 1934, 1947, 1953, 1959 and 2003, i.e. 8 cases in each century representing a  
97 total of 16 cases selected on the basis of the lowest Z-index and SPII values out of 10 homogenised  
98 precipitation series (Brázdil et al., 2012). The evaluation of particular years includes the  
99 meteorological and synoptic conditions, drought impacts, monthly values of air temperature,  
100 precipitation, SPII, SPEII and Z-index. In the identification of hydrological drought in the 1860s and  
101 1870s, a similar result was reached by Elleder et al. (2019) when analysing the catastrophically dry  
102 year 1874 by analysing the newly reconstructed series of water levels in Prague (1825-1890).

103 But what credible documents of low water levels existed before 1851 (the start of record-keeping in  
104 Děčín), 1825 (the start of record-keeping in Prague) or 1727 (the start of record-keeping in  
105 Magdeburg)?

106 Based on reconstructed data on temperatures and precipitation between 1766 and 2015, Hanel et al.  
107 (2018) indicated extreme deficits in precipitation, runoff and water content of the soil surface layer,  
108 identifying the droughts of 1858-1859, 1921-1922 and 1953-54 as extreme.

109 However, there is no doubt, similar to flood analysis, that verifying the model results according to the  
110 actual water level and flow rate increases their credibility considerably. We have a relatively large  
111 range of palaeostage indicators to describe the maximum water levels during a flood. These  
112 palaeoflood indicators comprise various types of sedimentary (e.g. slackwater flood deposits) and  
113 botanical evidence such as impact marks and damage on trees (Benito et al., 2004, 2015, Wilhelm et  
114 al., 2019, Schulte et al. 2019).

115 Low water levels and flow rates for preinstrumental hydrology are seldom addressed, with some  
116 exceptions. For instance, Shamir et al. (2013) presented methodology to identify field-based  
117 geomorphologic marks of low flows in ephemeral arid streams that can be indicative of minor flash  
118 floods. Unfortunately, the motivation is different and the potential for indicating historical low flows  
119 in humid climates has low utilisation.

120 Therefore, low water level indicators available through documentary sources are unique data records  
121 (Brazdil et al., 2018) for recording past hydrological droughts, with the precision given by physical  
122 imprints provided by epigraphic marks.

123 During the drought, attention was paid to objects normally hidden below the water level. Most often  
124 these were large boulders, protruding rocks and sometimes even point bars or slip-off slope sandy  
125 deposits with specific local names. In many cases these were also artificial objects, protruding  
126 foundations of old bridges and building elements; around the Rhine these were the remains of old  
127 buildings or old bridges etc. (Wittman, 1859). Sometimes there was an interesting local tradition; in  
128 the sandstone area on the Czech/Saxon border it was the creation of commemorative inscriptions,  
129 particularly inscribing the current year with the low water level. Today, these objects are mostly called  
130 hunger stones.

131  
132 This article focuses on these hunger stones; it seeks to clarify their purpose, origin and meaning.  
133 Traditionally, water management experts and historians and perhaps ethnographers in Bohemia  
134 considered inscriptions and the year as indicated on hunger stones to be an interesting phenomenon  
135 symbolising drought.

136 At the same time, however, the understanding prevailed that the marks of 'dry years' were merely  
137 commemorative records with no deeper meaning and that they were more or less randomly positioned.  
138 We believe that it is in this area that we have taken a substantial step forward in the explanation and  
139 possible use of these records.  
140

141 We have therefore focussed on the city of Děčín, located in the lower section of the Czech part of the  
142 Elbe river basin. The best-known hunger stone is located here and all important height surveying of all  
143 the epigraphic marks was undertaken in the summer of 2015. In 2018 the whole stone was scanned.  
144 This article discusses to what extent the inscription years have the character of historical minimum  
145 water levels.

146

147 Objectives

- 148 1. To document and explain the phenomenon of hunger stones in more detail.
- 149 2. Are the year marks only commemorative for that dry year and when do they represent exact  
150 records of annual minimum water levels?
- 151 3. Are there consistent relations in the heights of stage minima among different stones?
- 152 4. What is the relation to the systematic series of measurements?
- 153 5. Do the elevations suggest any trend in water levels?

## 154 2. The Elbe River region in the Czech Republic and the city of Děčín

155

156 The Elbe river valley between Litoměřice and Píra was made famous by a number of prints and  
157 paintings by 19<sup>th</sup> century Romantic painters such as Adrian Zingg (1734 – 1816) and Caspar David  
158 Friedrich (1774 – 1840). Zinnings was Swiss, but lived in Dresden; he probably coined the name of the  
159 Saxon Switzerland region, which later extended to Czech — Saxon Switzerland (Frölich – Schauseil,  
160 A., 2018). The Elbe, which leaves the territory of the Czech Republic in a deep rocky canyon and ends  
161 its upper stretch here, flows between Lovosice and Děčín through the Krušné hory mountain system.  
162 Along its path it first intersects the volcanic zone of the České středohoří area. Below Děčín, it then  
163 flows through a landscape of sandstone formations. The Elbe riverbed is situated at an altitude of  
164 about 120 m above sea level in a deep sandstone valley 200-300 m below the level of the sandstone  
165 plateau (350-450 m above sea level). Protruding volcanic formations reach a height of 500-800 m  
166 above sea level. The Děčín and Hřensko cross-sections represent the closing profiles of the Czech part  
167 of the Elbe. In addition to wood, local sandstone was a traditional building and sculptural material here  
168 and throughout the North Bohemian region. However, it was also used for rich epigraphic production  
169 on the spot — on rocks and boulders (Jenč, Peša, Barus, 2008). It is quite logical that water levels  
170 were recorded adjacent to the river where possible, both minima and maxima.

171

172

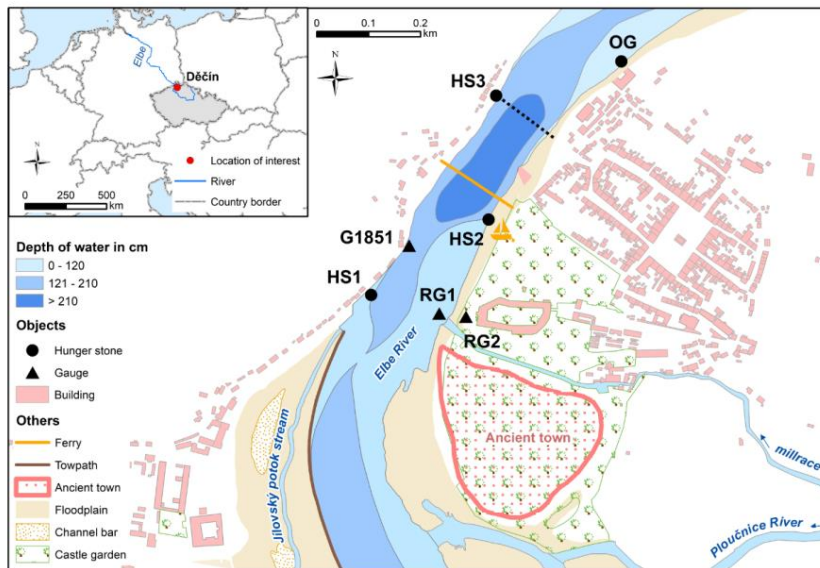

173  
 174 Fig. 1 The city of Děčín in 1842 with indication of the original extinct town (13<sup>th</sup> – 14<sup>th</sup> century), area  
 175 of shallows (lightest blue), water gauges RG1, RG2, G1851 and OG and three hunger stones (HS1,  
 176 HS2, HS3)

177  
 178 At the centre of our study is the city of Děčín (Fig. 1), known among other things for its unique series  
 179 of flood marks (Brázdil et al., 2005, Elleder, 2016a) and hunger stone. The earlier documentation,  
 180 which comes from commission inspections of the Elbe riverbed revealed previously unknown facts. In  
 181 1842, there were still a total of three hunger stones in the city of Děčín with engraved years, two on  
 182 the left bank [HS1, HS3] and one on the right bank upstream of the ferry crossing [HS2] (Protokoll,  
 183 1842). The preserved stone [HS3] which is located in the lower part of the deeper riverbed is the  
 184 centre of our attention.

185 This place was probably advantageous long ago as a settlement with a ford at the river confluence and  
 186 below the protruding sandstone ridge. At the end of the 13<sup>th</sup> century a royal town was founded here  
 187 (Fig.1, Velimský, 1991). Possibly in connection with the period of a of floods rich period, between  
 188 1342 and 1374 (Elleder, 2015), it was abandoned and transferred to the other side of the rock ridge,  
 189 where a castle stood and the manor house is situated nowadays. There were at least two places in  
 190 Děčín that were problematic from a navigational point of view. The first hunger stone [HS1] was  
 191 located near the first water shallows area. It is related to the confluence of the Elbe River with the  
 192 Ploučnice River entering from the right, the Jilovský potok stream from the left and the sediment  
 193 deposits. On the rock below the castle there are flood marks from 1432 carved into the rock block.  
 194 Alongside, a water gauge is located with indication of the Prague ell units of length (1 ell = 59 cm)  
 195 [RG2]. This gauge starts at 9 ells above the water level for full navigability (*Bohemia daily*, 1845).  
 196 This depth was traditionally referred to as the 'Fünfspänner', i.e. 'five-span', a sufficient navigational  
 197 depth of 5 spans or 50 inches, or 125-130 cm for the full loading of the Elbe ships (*Bohemia daily*, No  
 198 45, dated 4 April 1845). There was a rock block near the shore with a water gauge for low water  
 199 levels in feet [RG1] (1 to 5 feet), probably related to safe passage. In 1851, water levels in Děčín  
 200 began to be systematically monitored, initially at the old water gauge [OG] at the site of the navigation  
 201 directorate. Apparently, the water gauge served for navigation to efficient ship loading for the second  
 202 water shallows area. It still bears the original German, now popular, name of 'Heger', or supervision.  
 203 Later, the observation was transferred to a new water gauge [G1851] (see Chapter 3.5.).

### 204 3. Methodology

205

#### 206 3.1. Data and documentary sources

207 The first partial goal was to prove that the water level marks on the hunger stone in Děčín and other  
208 stones were meant by their creators as signs of annual minima in the years attached to the water level  
209 mark. The simplest means is a comparison with concurrent water level measurements on a nearby  
210 water gauge (accurate identification) and the use of other available measurements (approximate  
211 confirmation of significant water level decline). We used primarily four series stored in the CHMI  
212 (Czech Hydrometeorological Institute). These are the systematic series at the sites of Magdeburg  
213 (1727-1880), Dresden (1801-1829), Prague (1825-1890) and Děčín (1851-2019).

#### 214 3.2. A series of daily water levels in Magdeburg, 1727-1880

215 Prof. Harlacher, the first head of the Prague Hydrological Service (Elleder, 2012), needed a long water  
216 level series for studying past drought periods. In 1875–1880 he obtained the oldest series from the  
217 Water Management Directorate in Magdeburg. This record was found 110 years later, in the 1990s in  
218 the unclassified records of the Prague Hydrological Service. A copy was sent to the IKSE Magdeburg  
219 headquarters. Digitisation was carried out in 2005-2007 in cooperation with the CHMI and T. G. M.  
220 WRI. The value of these measurements is considerable, as the series covers the whole period of 64  
221 years in the 18<sup>th</sup> century continuously and there is no other alternative for Central Europe. Its  
222 disadvantage is the downward trend in annual minima, which can be explained largely by the  
223 shortening, deepening and changing of the profile of the Elbe River around 1816 (Simon et al., 2005).  
224 However, in our case we can identify very well particular annual water level minima and their  
225 associations with the years on hunger stones between 1746 and 1800 (hereinafter 'DM' for minimum  
226 water level signs). By identifying the annual minimum water level in Magdeburg, we could estimate  
227 the likely date of creation of the DM in Děčín, considering the Děčín-Magdeburg water transit time (6  
228 days).

229

#### 230 3.3. A series of daily water levels in Dresden, 1801-1829

231 A copy of this series, probably made by an official of the Prague City Hall in 1829 offers evidence that  
232 the systematic series does not begin in 1806 (Fügner, D., Schirpke, H., 1984, Fügner 1990) but at least  
233 in 1801. The series was found in the 1990s by a private researcher, J. Svoboda, in the Prague City  
234 Archives, and he left it to CHMI. Dresden has a clear advantage over Magdeburg in its geographical  
235 proximity to Děčín, so we preferred it for the 1801-1829 period.

236

#### 237 3.4. A series of daily water levels in Prague, 1825-1890

238 In Prague, an occasional water gauge (possibly flood gauge) was probably established by A. Strnad,  
239 the director of the Klementinum observatory in the profile at the Monastery of the Knights of the  
240 Cross in 1782 (Brázdil et al., 2005, Elleder, 2016a). Later (about 1821) it was transferred to the profile  
241 of the Old Town mills. Systematic observation of the water gauge started in 1825 (for more detail, see  
242 Elleder, 2016). The profile of the Old Town mills was related to the weir normal (i.e. to the weir crest)  
243 so it was a profile that did not change. According to Novotný (1963), the original observation diaries  
244 and perhaps even annual reports of the measurements were lost. Only the published values of the  
245 monthly minima, maxima and averages in the yearbooks of the Klementinum observatory remained.  
246 Similarly to other observations (e.g. in Magdeburg and Vienna), the Prague observations were  
247 published weekly and later daily, in daily newspapers. Therefore, we decided to regain the daily  
248 measurements of water levels published in the daily *Prager Zeitung*, starting with January 1825. The  
249 data were collected for three years by an external CHMI associate, Zvonimír Dragoun in the archive of  
250 journals and newspapers of the National Museum in Prague. The measurements were used similarly to  
251 the previous series, particularly for the 1825-1850 period. A special publication will be devoted to the  
252 complete time series.

253 **3.5. A series of daily water levels in Děčín, 1851-2019**

254 Similarly to other profiles along the Czech section of the Elbe River, a systematic observation of water  
 255 levels was introduced in Děčín. At first there was an old water gauge [OG] (Fig. 1), which was located  
 256 in the profile at the site of the steamship navigation directorate, probably before 1842. Later, but  
 257 probably no earlier than 1858, the new water gauge [G1851] started to be used on the pillar of the  
 258 Empress Elizabeth Bridge (built in 1851). The problem is a newfound uncertainty in the change of the  
 259 zero point of the water gauge (Protokoll, 1858) the height of which might have been elevated by 16"  
 260 (i.e. about 42 cm) in 1858. It is not entirely clear from when exactly the data from the old annual  
 261 reports of measurements of the Děčín series are related to the new zero height (monthly reports are  
 262 available only after 1875). The minima of water levels on hunger stones [DM] are therefore partly a  
 263 possible verification of early measurements in Děčín. Even later, around 1877, the water gauge was  
 264 transferred to the waterfront (Harlacher, 1883). At that time, from November 1876 to March 1881,  
 265 Prof. A. R. Harlacher was performing hydrometric measurements with his colleague J. Richter and  
 266 their associates (Harlacher, 1883). From this time, we have measurements up to 169 cm of water level  
 267 at a measured flow rate of  $90 \text{ m}^3 \cdot \text{s}^{-1}$  (Table 1). For interpolation and extrapolation of the curve, the  
 268 formula  $Q = 78.09 (H_0 + 1.45)^{1.953}$  was applied. According to this formula, the water level at 140 cm  
 269 ( $H_0 = -60 \text{ cm}$ ) would correspond to a flow rate of  $57 \text{ m}^3 \cdot \text{s}^{-1}$  ( $H_0$  is the water level corresponding to the  
 270 height of the water before the shift of zero of the water gauge by -200 cm made on 1 October 1939).  
 271 Novotný (1963) reports the successive shift of the rating curve and presents the evaluation of historical  
 272 flow minima. Of these, for the water level of 133 cm (on 23 August 1868) he reports the flow rate of  
 273  $50 \text{ m}^3 \cdot \text{s}^{-1}$  and for the stage of 137 cm (on 6 September 1874), the value of  $54 \text{ m}^3 \cdot \text{s}^{-1}$ . After the riverbed  
 274 modification around 1891, the curve changed substantially in the section of low flow rates (Table 1).  
 275 He evaluated the significantly lower flow rate for the water stage at 113 cm only later, on 19 August  
 276 1904, at  $39 \text{ m}^3 \cdot \text{s}^{-1}$ . This is a significant difference that would affect the flow rates at the extreme  
 277 minima of 1868 and 1904, and the question is whether to trust the 1876-1881 curve when it was  
 278 impossible to evaluate the lowest water levels, as the flow rate was significantly higher than average.  
 279 Hydrometry of small flow rates on the Saxon side has been available since 1886, but for extremes,  
 280 only since 1893. Therefore, in the results, the flow rates at individual minima are accepted so far with  
 281 caution.

282

283 Table 1 The oldest measurements of very low flow rates in Děčín and on the Saxon side

|                | Date         | H [cm] | Q [ $\text{m}^3 \cdot \text{s}^{-1}$ ] / location of the flow rate measurement |
|----------------|--------------|--------|--------------------------------------------------------------------------------|
| <b>Děčín</b>   | 28. 7. 1876  | 163    | 90 / Děčín *                                                                   |
|                | 13. 10. 1877 | 167    | 96 / Děčín*                                                                    |
|                | 29. 8. 1893  | 144    | 63 / Děčín*                                                                    |
|                | 13. 8. 1904  | 119    | 46 / Děčín*                                                                    |
|                | 29. 8. 1911  | 118    | 56 / Děčín*                                                                    |
| <b>Dresden</b> | 17. 7. 1893  | -179   | 56 / Großschepa **                                                             |
|                | 14. 7. 1893  | -172   | 63/ Kötschenbroda **                                                           |

284 \*Old hydrometry, 1877-1940, \*\* (Elbeströmbauverwaltung, 1897)

285 **3.6. Preliminary verification using regional press**

286 This study was preceded by about 10 years of waiting (since 2005) for a suitable opportunity to  
 287 undertake a field survey of hunger stones that are totally or partially below the surface at normal  
 288 summer flow rates. There was no other possibility than to try to find an alternative solution. In 2009,  
 289 as part of a preliminary study, we tried to use rich iconographic material from the period from 1894 to  
 290 1994 and reports of the hunger stone in Děčín in contemporary newspapers. In the older press  
 291 materials, reports were looked up that showed when the hunger stone was visible and an indication  
 292 was given as well as to which year marks were above the relevant water level. Then it was easy to  
 293 classify the marks into height groups with a water level higher than that of the day reported. Further  
 294 specification of heights was possible only on the basis of photographs by comparing which mark was

295 higher or lower in the given group. The marks were connected by contour lines indicating the resulting  
296 bands. The estimated water levels were then compared with the annual minimum values. The result  
297 pointed to the expected possible concordance with the annual water level minima. We have followed a  
298 somewhat similar approach with the hunger stone in Pírna.

### 299 **3.7. Field measurements**

300 In 2011, it was possible to carry out field verification of the estimated heights of the marks that were  
301 located on the highest part of the stone. In 2014, this opportunity was not used as we believed that the  
302 dry season would have a longer-term character, which was confirmed in 2015 and 2018. In 2015, the  
303 hunger stone in Děčín [HS3] and the stone in Těchlovice were surveyed. During the surveying of the  
304 stone in Těchlovice located on the slip-off slope of gravel deposits, it was not necessary to make any  
305 ground adjustments. However, only relative heights recalculated to the minimum height of 1842 were  
306 measured.

307 The surveying of the Děčín stone in 2015 required preparation representing sediment removal and  
308 stone cleaning (manual work of 2 to 3 people for 3 hours or more). In 2015, the sediment layer  
309 reached the mark of 1616, i.e. around 70 cm in height. In addition, it was necessary to make a pit  
310 around the stone's very low marks. The use of a pump with a syringe to wash away sediment, blasting  
311 stone and pumping water from the sump significantly accelerated the work.

312 The measured mark heights were linked to the fixed geodetic point nearby. All surveyed geodetic  
313 levelling points were photographed. The measurement took place on 14 August when water levels  
314 dropped the lowest just before the expected rainfall episode which increased the Elbe water level  
315 significantly. The participants in the measurements were: Ladislav Kašpárek and Jan Kašpárek from T.  
316 G. M. WRI, Libor Elleder from CHMI and a land surveyor, Zvonimír Dragoun (presented on EGU  
317 2016, Elleder, 2016b).

318 We did essentially the same when scanning and creating a 3D model in 2018. The stone was prepared  
319 by colleagues from CHMI: Martin Groušl, František Pěkný and Martin Hubený in advance on 27 July.  
320 The final adjustment was made on the day of measurement and was assisted by Daniel Kurka, Libor  
321 Elleder and Martin Hubený. Hubený also performed a hydrometric measurement in the hunger stone  
322 profile (Fig. 1 [HS3]), including the cross-section measurement using the ADCP (acoustic Doppler  
323 current profiler). 3D scanning was performed by Libor Tělupil from the VR3D Company  
324 (<http://vr3d.cz>) on 30 July, which lasted for about 3 to 4 hours. Similarly, the marks on the rock in the  
325 [RG2] profile were scanned. Because scanning requires soft, shadow-free lighting, a temporary stand  
326 was placed over the stone. The whole event was documented by the local press  
327 ([https://www.idnes.cz/usti/zpravy/decin-vodomer-hladovy-kamen-skenovani-3d-model.A180730\\_113803\\_usti-zpravy\\_mi](https://www.idnes.cz/usti/zpravy/decin-vodomer-hladovy-kamen-skenovani-3d-model.A180730_113803_usti-zpravy_mi)) and the result is partially accessible on the CHMI website  
328 (<http://portal.chmi.cz/historicka-data/hydrologie/zaznamy-z-minulosti/hladovy-kamen>). Both  
329 measurements in 2015 and 2018 were performed during hot summer days with temperatures of 38 °C  
330 in the first case and around 30 °C in the second case. An independent surveying campaign was carried  
331 out in 2015 by the Elbe River Administration, state enterprise (Randák et al. 2015, 2018a, b) and in  
332 2018 also by hydrologists and archaeologists from Saxony (Walther et al., 2018).

334

### 335 **3.8. Measurement processing**

336 In 2015, 33 points were surveyed, mostly engraved lines with attached year indications. For obvious  
337 reasons, making a DM mark is much more difficult than making a flood mark. It is difficult to estimate  
338 when the water level starts to rise (see discussion). Therefore, it was not always certain whether the  
339 sign would represent an indication of the immediate low water stage (LL), the local minimum (LM) or  
340 the annual minimum (AM). For verification and approximate determination of the minima marked on  
341 hunger stones (DM) prior to 1727, only documentary sources are available, i.e. reports on weather and  
342 impacts of hydrological drought, such as the drying of smaller streams and wells, shutdowns of small  
343 and medium mills, or the necessity to travel dozens of kilometres to a grain mill. We reproduce this  
344 information primarily from Brázdil et al. (2015). The decade frequencies of drought occurrence since



345 1500 (Brázdil et al., 2013) were a valuable basis for verifying the position of marks, especially in the  
346 16<sup>th</sup> and 17<sup>th</sup> centuries.

347 For the evaluation of the DM marks made after 1727 we used the above-mentioned series of  
348 measurements in using the Magdeburg series rather for dating verification and the Prague and Dresden  
349 series for assuming a very approximate estimate of the significance of the minimum. Concerning  
350 newer cases after 1851, it is possible to confirm the correct or incorrect position of the mark (DM).  
351 Regarding deviations from the measured water level for that day, we consider the precisely marked  
352 height (PMH) at a deviation of 0-4 cm and approximately marked height (AMH) at a deviation of 4-8  
353 cm. We consider larger deviations as a possible mistake when placing the measuring rod or a poor  
354 understanding of a difficult-to-read position of the mark or line. If the DM mark does not have  
355 accurate dating, we can assume dating according to the minimum water level when there is exact  
356 (PMH) identification with the minimum water level.

357 One very important product is the digital model of a hunger stone, which can be viewed and edited in  
358 contrasts by selecting the '*shaders*' option using the Meshlab processing system  
359 (<http://www.meshlab.net/>), and thus clarifying the unclear situation and illegible marks. Given that at  
360 the time of measurement we had not always understood the situation in situ, it was possible to derive  
361 the missing height from the digital model by reading the position (x, y, z). Thus, the second mark was  
362 found on DM1616, DM1536 etc. In the survey diary, the actual measurement is clearly arranged,  
363 documented by photographing the position of the measuring rod and by the highlighted view of the  
364 described part of the stone. The measured heights of all marks and the position are presented on the  
365 stone, which is divided into 4 height zones and the embankment side [ES], left side [LS], right side  
366 [RS], front platform [P] and the highest parts of the ridge [R]. The presentation of the marks is  
367 chronological, so that the information is combined into a logical complex.

### 368 **3.9. Complementing measurements according to other objects**

369 Some marks (DM) are missing on the Děčín stone, but we find them elsewhere. If their heights were  
370 measured during commission inspections of the Elbe River in 1842 (Protokoll, 1842) and 1850  
371 (Protokoll, 1850), relative to the level of 1842, these differences can be utilised. Thus, some heights of  
372 extinct stone [HS1] were added in Děčín (1766, 1782), Dolní Žleb (1516, 1615, 1636, 1706, 1834 and  
373 1835) and Pima (1706, 1834 and 1835). For other hunger stones, we can only take into account the  
374 position of the marks, reviewing whether it is in accordance with or contrary to the facts found.

## 375 **4. Results**

### 376 **4.1. Brief history of low water stage records in context**

#### 377 4.1.1. The oldest documented field surveys of Czech rivers from 1640-1727 and trends in water levels

378 It is very likely that the most objective records of hydrological drought or more specifically, records of  
379 low water levels are related to navigation in Central Europe (Brázdil et al. 2019b mentioned a limiting  
380 of water transport in the years 1686 and 1746). It cannot be ruled out, for example, that mapping of  
381 the Vltava River (by David Altmann of Eidenburg) and the river regulation by Kryšpín Fuk (1640-  
382 1643), abbot of the Premonstratensian monastery in Strahov (Wiesenfeld, 1844), were made possible  
383 merely by a drier period, probably culminating in 1642 (documented by Pekař, 1998). Also, surveys of  
384 the upper Vltava river reaches carried out by Lothar Vogelmonte for the intended canal between the  
385 Danube and the Vltava rivers in the years 1700-1715 show a possible time relationship (Wiesenfeld,  
386 1844). The dry years of 1705, 1706 and 1707 (marked on hunger stones) could present an opportunity  
387 to explore the streams in times of low water levels. The drought in 1726-1728 clearly affected the  
388 beginning of water level measurement in Magdeburg (Hofmann, 1850) in 1727. It was probably  
389 connected with the frequently quoted commission of Jan Ferdinand Schor that carried out a survey of  
390 the Vltava River with regard to navigation and the construction of the first lock chambers (Wiesenfeld,  
391 1844). The agreement on duty-free navigation on the Elbe (see Faulhaber, 2000, 2013) from 1821 (the  
392 year was also marked on the stone in Děčín [HS3]) along the Elbe River up to Hamburg led to

393 increased interest in monitoring water levels for individual participating states, including the Austrian  
394 Empire and Saxony up to Denmark.

395 The catastrophic dry period of 1834 to 1836 affecting both the Elbe and the Rhine basins raised the  
396 issue of a general downward trend in water levels, especially in the Elbe basin. H. Berghaus pointed  
397 out this trend and the poor prospects of the Elbe navigation (Berghaus 1836, 1854). A forestry expert,  
398 Prof. Reuter of Aschaffenburg (Reuter, 1840), pointed out the possibility of this trend being linked to  
399 deforestation of the Central European landscape.

#### 400 4.1.2. The Elbe Commission in 1842 and surveying of hunger stones

401 In this context, there is a link with the disastrously dry year of 1842 (Brázdil et al, 2019a indicated  
402 that in 1842 summer precipitation was significantly reduced from Western to Eastern-Central Europe)  
403 and the Commission of the Elbe states (Austria, Saxony, Prussia, Anhalt, Hamburg and Denmark) was  
404 organised to improve navigation conditions. The aim was a thorough description of all fixed points  
405 (water stage gauges, flood marks and marks on hunger stones), navigation conditions and minimum  
406 navigation depths along the navigable section of the Elbe from the town of Mělník (Bohemia) to  
407 Cuxhaven (Saxony). Stones and rocks in the river were of dual importance for navigation. They were a  
408 dangerous element, but at the same time they served as orientation for navigation. The commissioners  
409 travelled by boat and the Mělník-Meissen section was surveyed from 5 to 11 September 1842, 14 days  
410 after reaching an absolute minimum water level. The water levels of the Vltava and Elbe were still  
411 very low, but they were already 9 to 20 cm higher than the minimum in the previous August. In the  
412 city of Děčín, measurements were made from 7 to 8 September (Protokoll, 1842) at a water level of  
413 about 3.5" (9 cm) above the 1842 minimum. Three hunger stones in Děčín (Fig. 1) and one in Dolní  
414 Žleb were identified and surveyed. On the Czech side, a water gauge in Litoměřice and a water gauge  
415 for navigation purposes in Děčín were noted in the section between Mělník and the state border (in  
416 both cases there were no regular records available). On the Saxon side, water gauges in Bad Schandau,  
417 Pirna, Dresden, Meissen and Riese were identified, managed by the Royal Navigation Directorate  
418 (Königl. Wassebaudirection Dresden). The hunger stones were detected and partially surveyed in the  
419 following locations: Schmilka and Pirna (see the text below) (Protokoll, 1842).

#### 420 4.1.3. The Elbe Commission in 1850 and linking the water level minima to the flood marks

421 The Commission compared the situation with the last commission survey in 1842 and registered the  
422 removal of some barriers to navigation. Gauging some low water levels through their relation to fixed  
423 points is of the utmost importance to the subject of this study. These fixed points were only flood  
424 marks (Roudnice, Ústí nad Labem, Děčín) and alternatively the current water level in 1850, or zero  
425 point of a water gauge were used (old water gauge in Litoměřice, Ústí nad Labem, railway water  
426 gauge in Dolní Žleb, water gauge during the surveillance in Pirna). Until now, only two of the original  
427 three hunger stones remained in Děčín. The Austrian Commissioner carried out a precise survey of all  
428 the flood marks on the castle rock in Děčín (Krolmus, 1845, Brázdil et al. 2005) and related their  
429 heights to the minimum of 1842. The Commission was active in September when there was a  
430 significantly higher water level than in 1842. Therefore, the marks on the hunger stones were  
431 underwater and thus were difficult to recognise. For the present stone [HS3], its top at 14½" (37.7 cm)  
432 was below the then current water level. Since, according to our measurement, the top is at the water  
433 level  $H = 176$  cm, the then current water level was about 214 cm and the flow rate was about  $190 \text{ m}^3 \cdot \text{s}^{-1}$   
434 (according to Harlacher's rating curve, 1883). The Commission had a new map of the Vltava River  
435 and the Czech Elbe River, which was created between 1843 and 1848 (Elbekarte, 1848) with depths in  
436 cross sections already marked. In the following year, on 1 January 1851, the daily observation of water  
437 gauges on the Czech Elbe River in the cities and towns of Mělník, Roudnice, Litoměřice, Ústí nad  
438 Labem, Děčín, and probably Dolní Žleb began. Zero points of the new gauges were established 6  
439 inches above the minima in 1842 (Protokoll, 1858). At this stage, half-cargo navigation was possible  
440 (Wex, 1873).

#### 441 4.1.4. The Commission and the catastrophic drought of 1858

442 The year 1857 was very dry, just as 1858 proved to be. The Commission was in Děčín on 20 May  
443 1858. The water level was in the range of -0.75 to -2.5" (about -2 to -7 cm) according to the new water

444 gauge. Just before that, according to the Protokoll (1858), the height of the zero point of the water  
445 gauge in Děčín and Dolní Žleb was increased by 16" (42 cm). The Commission identified the 1857  
446 minima as generally the lowest in the period between 1842 and 1858.

447 Considering the record low water levels of the Rhine, Dr. Josef Wittmann, Director of the Society for  
448 the Study of the History and Monuments of the Rhineland, published a comprehensive publication  
449 (Wittmann, 1859), which is also an inventory of periods with low water levels of the Rhine from AD  
450 70 (Tacitus's description of the very low water level of the Rhine) to 1858 and an overview of  
451 prominent objects hidden under water during a normal water stage on the Rhine. According to his  
452 work, the level of the Rhine dropped to a record low in 1858, lower than in 1788, 1813, 1818, 1822  
453 and 1830, at least according to the water gauge in Cologne. It was this alarming water level that was  
454 simultaneously the main motivation and the opportunity for his work. The year 1858 was recently  
455 indicated by Hanel et al. (2018) as one of the most extensive drought periods. The years 1857 and  
456 1858 in the Elbe basin are also at the beginning of two decades of occurrence of significant and  
457 catastrophic periods of low water levels. These periods are represented by the years 1858, 1863, 1864,  
458 1865, 1868, 1873 and 1874 (Elleder et al., 2019), most of which can be found on various hunger  
459 stones in the Elbe. At that time Professor Bruhus of Leipzig (Bruhus, 1865) was studying hydrological  
460 drought in Saxony. His work was the basis of a study by a Forest Counsellor von Berg (Berg von,  
461 1867), which again presents the same idea of the loss of water throughout Central Europe and  
462 documents it with the help of precipitation balance and minimum water levels not only in the Elbe,  
463 Oder and Rhine, but also the Elster and Mulda rivers. The author saw the cause again in the intensive  
464 use of the landscape, especially deforestation. The prominent Austrian water manager G. von Wex  
465 (Wex, 1873) applied the recorded minima of water levels from 1616-1842 when demonstrating a  
466 steady downward trend in 1842-1873. He also recalled the earlier views of H. Berghaus and the  
467 Prussian Counsellor Hagen. However, Hagen refuted the downward trend for the Rhine, for example.  
468 On the other hand, H. Grebenau, a noted expert in hydrometry who also participated in the famous  
469 international survey of the Rhine in 1867, supported the idea of flow decline with his flow  
470 measurements.

471 This drought also had a specific impact in Bohemia, the most industrial part of the Austrian monarchy.  
472 In 1869, another Elbe Navigation Commission (Wex, 1873) was held. In 1871 A. R. Harlacher, a  
473 professor at the Prague Technical University, established a temporary station for hydrometric  
474 observations and calculating the amount of runoff from the Czech Elbe (1871-1872) (Harlacher, 1871,  
475 1872). According to Cvrk (1994), the year 1873 brought the intensification of river regulation of the  
476 lower Elbe (mostly digging and removing boulders) and finally deepening of the riverbed by  
477 approximately 20-30 cm. The catastrophic drought in 1874 led, after a broad discussion, to the  
478 establishment of the Hydrographic Commission of the Kingdom of Bohemia based in Prague (Elleder  
479 et al., 2019). The floods and the generally wetter period of 1880-1882 ended the long occurrence of  
480 drought during the period of 1858-1878. Extensive hydrometric measurements, including a detailed  
481 mapping of the riverbed were made by Harlacher in Děčín between the old road bridge and the railway  
482 bridge in the 1880s (Harlacher, 1883). Harlacher was interested, as Berghaus earlier and von Wex at  
483 the same time, in the downward trend of the Elbe water levels. Therefore, he collected the above-  
484 mentioned series of measurements (Dresden series 1806-1872, not found in CHMI, and Magdeburg  
485 series 1727-1880).

486 4.1.5. River regulation of the Elbe — earlier and thus more frequent appearance of hunger stones

487 After the period from 1880 to 1891, the low water levels in 1892 and 1894 intensified the pressure to  
488 regulate the Elbe. In 1896, a Canalisation Commission was established for the regulation and  
489 canalisation of the Elbe between Mělník and Ústí nad Labem. The aim was to build a navigation link  
490 up to Prague and ensure a navigation depth of 180 cm (an increase of 50 cm) in the period 1896-1938  
491 (Cvrk, 1994). This is a very important fact for our work, as it resulted in a substantial shift of about 50  
492 cm in the flow rating curve in the Děčín profile in the area of low flow rates.

493 The next stage was to put into operation the Vltava cascade, the construction of the Slapy waterworks  
494 in 1957 (<https://www.kct-tabor.cz/gymta/VodniPrehrady/Slapy/index.htm>) and the Orlik waterworks  
495 in 1963 (<https://www.kct-tabor.cz/gymta/VodniPrehrady/Orlik/index.htm>). After this date, the minima

496 of flow rates were significantly higher than the previous ones (36 to 51 m<sup>3</sup>·s<sup>-1</sup>). In times of low water  
497 levels, the flow rate is sometimes enhanced by as much as 20 to 30 m<sup>3</sup>·s<sup>-1</sup>. For this reason, the flow  
498 minima today are around 65 to 75 m<sup>3</sup>·s<sup>-1</sup>. This means that we need to divide the tags on HS3 into at  
499 least three basic groups: a) 1516-1896, b) 1897-1956 and c) 1957-2020.

## 500 4.2. Hunger stones and other indicators of low water stages in the European context

### 501 4.2.1 Hunger stones, antique monuments and other indications of low water stages in the Rhine basin

502 Witman's work suggests that the oldest designation dates back to 1305 in Olten on the Aare River and  
503 in Strasbourg in the same year or in 1302 or 1303. The most notable example is the so-called  
504 'Laufenstein' in Laufenberg at the confluence of the Aare and the Rhine, which used to be visible  
505 when the flow of the Rhine decreased below 300 m<sup>3</sup>·s<sup>-1</sup>. Civil Engineer Heinrich Walter surveyed the  
506 marks on this stone around 1890 (Walter, 1901). There were a total of 10 DM marks: 1541, 1692,  
507 1750, 1764, 1797, 1823, 1848, 1858, 1891 and 1893. Walter reported the height above sea level for the  
508 marks from 1541, 1750, 1858, 1891 and 1893.

509  
510 Some marks were compared with the observed series and corrected by Pfister et al. (2006). Near  
511 Unkel in the dry season of 1766, the dates of 1521, 1567 and 1639 were visible on the basalt rock  
512 called 'Unkelstein' (i.e. basalt in the Land of Rhineland-Palatinate in translation). However, the  
513 situation in autumn 1766 was ¼ foot lower (Johannes Jansen notes, Weikinn, 2000). In the past, there  
514 were several places in the Rhine basin known as 'Hungerstein' or 'Hungerfelsen'. One of the oldest  
515 pictorial documents was published by Merian (Merian, 1645), perhaps according to the field sketches  
516 of Prague graphic artist Václav Hollar, who after emigration cooperated with Matthäus Merian. In the  
517 foreground is the 'Ara Bakchi', 'Altarstein' or 'Elfenstein' (Fig. 2, Fig. 3), which is just one of the  
518 sites that used to be accessible only during the low water stages of the Rhine.  
519

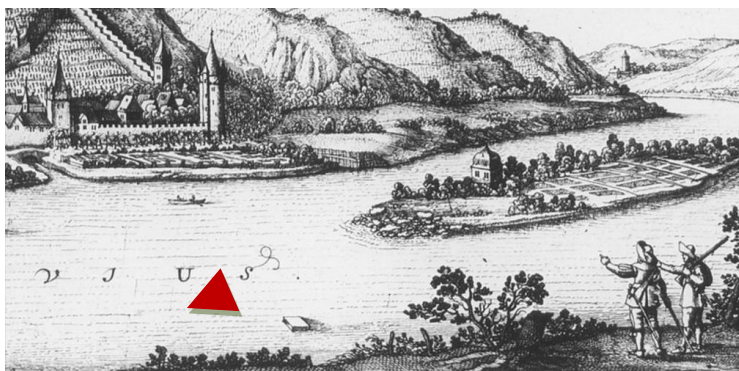

520  
521 Fig. 2

522 Fig. 2. Drawing documenting the position of the hunger stones known as Ara Bakchi, Altarstein and Elfenstein  
523 near Bacharach, perhaps in the dry season of 1636, 1639 or 1642 (Merian, 1645), the position of which is  
524 marked by a red triangle in a cut-out view of Bacharach.

525

526 Among similar objects there is, for example, the rock in Olten in the Aare River. Around Bodensee,  
527 such objects indicated low lake levels in Staad, Mammern and Konstanz. In 1750, the remains of the  
528 assumed ancient buildings, the pillars of the bridge in Cologne and the aforementioned Altarstein were  
529 visible during low water levels, and in 1746 the pillars of the old bridge in Mainz were visible (Fig. 3).  
530 The tradition of storing 12 bottles of wine at a hunger stone on the bottom of the Moselle in Trarbach  
531 is also remarkable.

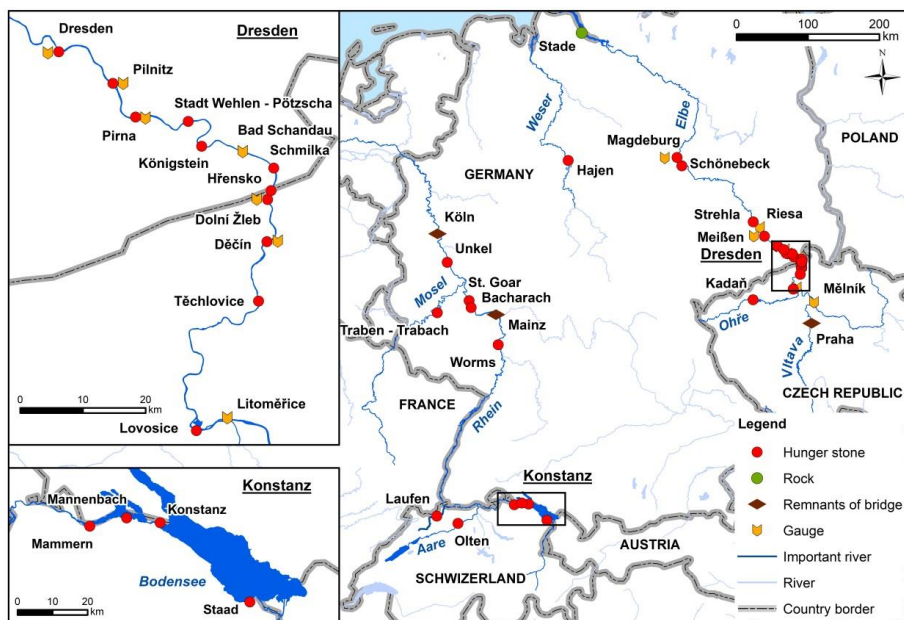

532  
533 Fig. 3 Central Europe and the occurrence of objects similar to the hunger stone in Děčín

534  
535 4.2.2. Hunger stones on the Elbe and their removal

536 Along its upper reaches the Elbe is a much smaller river than the Rhine, for example in the narrow  
537 canyon area between Bingen and Koblenz (with an average flow rate of approximately  $2,000 \text{ m}^3 \cdot \text{s}^{-1}$ ,  
538 minimum around  $400 \text{ m}^3 \cdot \text{s}^{-1}$ ). The Elbe has an average flow rate of approximately  $300 \text{ m}^3 \cdot \text{s}^{-1}$  between  
539 Děčín and Pirna and without the enhancement by the Vltava cascade the minimum flow rate was  
540 dropping until 1957 (the beginning of operation of the Slapy water reservoir), or 1963 (the beginning  
541 of operation of the Orlik reservoir), respectively, as low as to approximately  $35\text{-}41 \text{ m}^3 \cdot \text{s}^{-1}$  in the years  
542 1904, 1911, 1921, 1934 and 1947 (Novotný, 1963). The lowest water levels were recorded on the  
543 Rhine in October or in the winter. Low water levels of the Elbe typically occur from June to  
544 September, but in 1874, for example, they lasted until December (Elleder et al., 2019). However, low  
545 levels were recorded even in winter, during times of severe frost. On the Czech side downstream, the  
546 first but rather modern stone was the object in Lovosice (since 1904), then in Těchlovice (1 hunger  
547 stone, additional HS object), Děčín (1-3 HS objects), Dolní Žleb (11 HS objects), Hřensko (15 HS  
548 objects), Schmilka (1HS), Königstein (2 HS objects), Pima (2 HS objects), Wehlen (1), Pillnitz (1  
549 HS), Dresden (3 HS), Meissen (?) and Strehla (1 HS) (see Fig. 3).

550 The term ‘Hungerstein’ was not often used in the 19<sup>th</sup> century. In scientific literature we find the  
551 names of the low water levels as ‘*Merkzeichen der Wasserstände*’ (Neue Schriften, 1845), in the news  
552 reports the term millstones as ‘*Malsteine*’ appeared. The commissions' reports in the Protokoll (1842)  
553 and Protokoll (1850) mention the stones as ‘*Steine*’, and the remarkable ones as ‘*Merkwürdige Steine*’.  
554 The Elbe in the sandstone canyon used to be rich in local names: ‘*Frog Stones*’ or ‘*Froschsteine*’  
555 (Dolní Žleb) (Protokoll, 1842, p. 44), as well as ‘*Monk’s Stone*’ (*Mönchstein*) and ‘*Millstone*’  
556 (*Malstein*) that were removed in 1858 (near to the customs office in Dolní Žleb). Two hunger stones  
557 with dates (see the text below) opposite the church were designed for blasting. In 1842, stones near  
558 Žertovice, and in 1850, on the Saxon side at the Ober Vogelsang site (the ‘*Hermsteins*’) were blasted  
559 away. The term ‘Hungerstein’ appeared in a newspaper article in 1842 (Pillnitz) in a newspaper in

560 connection with HK in Meissen in 1865 (*Rumburger Zeitung* No 47 dated 11 October 1865), and in  
 561 1876 (*Teplitzer Zeitung* No 98 dated 30 August 1876). The Czech-derived mutation, 'hladový kámen'  
 562 ('hunger stone') was introduced by the regional daily *Jizeran* (17 September 1892) during the drought  
 563 in 1892.

#### 564 4.2.3. Hunger stone in Těchlovice

565 The site is located above the sandstone canyon and the valley is formed by rocks of volcanic origin.  
 566 On the left bank of the Elbe River, approximately in river km 85 (below Mělník), the Elbekarte map  
 567 (1848) shows the 'Mändelstein' in the riverbed, but actual stone is on a gravel bench and the affinity  
 568 of the objects is unlikely. The Protokoll (1842) mentions a strong current and a place with a depth of 1'  
 569 8" that is only about 50 cm. The Protokoll (1850) only reports on depths around 160 cm, the Protokoll  
 570 (1858) does not mention depths nor stones in Těchlovice at all. The estuaries of the two streams create  
 571 flow sediment cones, during low water levels the stone is separated from the water and lies on a wide  
 572 gravel bench. For technical and time reasons, only relative geodetic link and height measurements  
 573 were made in 2015. There are 7 marks on a flat boulder of volcanic origin (1868, 1874, 1892, 1904,  
 574 1928, 1980, 2015) (Table 2). The mark of 2015 was prematurely made by an unknown person and  
 575 does not correspond accurately to the minimum water stage that occurred later.

576 Table 2 Survey of DM heights in Těchlovice

|      | $H_R$ heights | $H_{1842}$ | $H_{DE}$ |
|------|---------------|------------|----------|
| 1842 | -104          | 0          | 132      |
| 1874 | -108          | -4         | 128      |
| 1892 | -109          | -5         | 127      |
| 1904 | -133          | -29        | 104      |
| 1928 | -114          | -10        | 122      |
| 1980 | -102          | 2          | 134      |
| 2015 | -150          | -46        | 86       |

577 **HR** water level of DM, levelling in 2015 linked to auxiliary point, **H<sub>1842</sub>** DM water level relative to the level of  
 578 DM1842, **H<sub>DE</sub>** water level accommodation to present Děčín gauge, **H<sub>DE</sub>**, approximate conversion to the water  
 579 level in Děčín according to water stage in 1842 (132 cm)

#### 580 4.2.4. Hunger stones in Děčín

581 In 1842, three hunger stones were examined within the activities of the Elbe River Commission  
 582 (Protokoll, 1842) (Fig. 1).

583 According to the report, the first hunger stone [HS1] was located near the left bank of the Elbe  
 584 opposite the castle rock, i.e. also opposite the well-known flood marks from 1432-2013 and the  
 585 historical rock water gauge [RG2] on the right bank (Brázdil et al., 2005) (Fig.1). On the stone [HS1],  
 586 the approximate depths of [DM] minima in 1719 and 1766 were measured in September 1842. The  
 587 1782, 1790, 1835 and 1842 marks were surveyed precisely (Table 1). Elevation ratios were expressed  
 588 as heights above the previous August minimum of 1842. In 1850, the depth of the 1782 mark [HS1]  
 589 was determined as 7.5" (19.5 cm) below the water level, the 1842 mark was not visible (it is seen in  
 590 Table 1 that it was 41.5 cm below the water level). The Protokoll (1850) implies a link of this mark  
 591 with a water gauge for low water levels [RG1] on a rock formation with a scale ranging from '1F' to  
 592 '5F' (5 Fuß, 5 feet). It is a question whether this gauge was linked to a large gauge on the castle rock  
 593 [RG1]. A similar water gauge which may have been partially preserved is described by the  
 594 commissioners at the HS in Pima.

595 The second hunger stone [HS2] was supposed to be upstream of the ferry crossing on the right bank.  
 596 There was a minimum mark from 1800 situated 4.5" (approximately 11 cm) above the minimum of  
 597 1842. In 1850 the commissioners stated that the first [HS1] and the third stone [HS1] remained in  
 598 place, while the second stone [HS2] was already unavailable at the time of the second commission's  
 599 work. It is stated that the reason was the construction of the railway (Protokoll, 1850). Since the  
 600 railway was on the left bank, we tend to consider the possibility that the stone disappeared during  
 601 terrain works for the construction of a new bridge (opened only later in 1851). The railway was built  
 602 between 1847 and 1848 and operation started in 1851.

603 The third stone [HS3] was located by the commission on the left bank and it still exists. This object is  
 604 the centre of our focus. The commissioners described the 1616, 1746 and 1790 marks which were  
 605 documented many times later in 1892, 1904, 1911 etc., and also mentioned the 1835 mark (not found).  
 606 Unfortunately, they only determined a difference of 5" (12-13 cm) between the higher minimum of  
 607 1616 and the then lowest minimum of 1842 (a difference of 11 cm was determined in 2015).

608 The stone (see the methodology) was divided into four height ranges and the following sides:  
 609 embankment side [ES], left side [LS], right side [RS], platform [P] and the highest part of the stone's  
 610 ridge [R] (Tab. 3, Fig. 4)

611

612 Table 3 Division of HS3 stone and list of marks by ranges

| Water level ranges | ES (embankment side)                           | R (ridge) | RS (right side)  | LS (left side) | P (platform)                                   |
|--------------------|------------------------------------------------|-----------|------------------|----------------|------------------------------------------------|
| A) 151-175 cm      |                                                | 1963      | —                | —              |                                                |
| B) 111-150 cm      | 1536, 1616, 1746, 1790, 1800, 1811, 1842, 1868 | —         | —                | —              | 1707, 1842, 1904, 1892, 1893, 1957, 1990, 2003 |
| C) 91-110 cm       | 1921, 1934                                     | —         | 1911, 1921       | —              |                                                |
| D) 71-90 cm        | —                                              | —         | 1930, 1934, 1947 | 1947           |                                                |

613

614 The platform P, the ridge part R and the ES side of the stone are about 360 cm wide, the distance  
 615 between the bank and the river is about 400 cm. The oldest marks: 1616, 1746, 1790, 1800, 1811,  
 616 1842 and 1868 were placed on the side [ES] facing the river bank in the range of 111 to 150 cm. Only  
 617 the mark of 1707 was placed on the platform [P], where the markings from 1892 to 1904 continued.  
 618 The minimum marks of 1904 and 1911 were simultaneously placed on the right side of the stone [RS]  
 619 (downstream). The lack of space also apparently led to rewriting of the inscriptions at the 1911 mark  
 620 and a large inscription: *'Wenn du mich siehst ...'*. The marking of 1921 returned to the right side [RS],  
 621 which was not large enough for a new lower marking below 100 cm. Deeper marks in 1930, 1934 and  
 622 1947 were placed again on the side of the stone [RS]. The demanding 1947 mark is also on the left  
 623 corner [LS] of the stone. The latest markings of 1957, 1990 and 2003 are again on the lower part of the  
 624 platform [P] and the mark of 1963 on the ridge [R]. The marks of 2015 and 2018 were not placed on  
 625 the stone. An overview of the water level minima of measured and derived heights is given in Table 4.  
 626 The list of marks in Table 4 is chronological so that the information is combined into a logical  
 627 complex (detailed information is included in the supplement).

628 Using the example of the measurements in 1850, it is possible to clarify the system of rock gauges  
 629 [RG1], [RG2] and [OG] linked to hunger stones, the newly measured heights of the flood of 1784  
 630 (2004) and the minimum of 1842 (2015). An administrator at the Děčín estate, who was also a forester  
 631 and contributor to the Patriotic Economic Society Seidel (*Neue Schriften*, 1843) determined the height  
 632 of the flood mark of 1784 on the rock gauge [RG1] as 32'1"10" (i.e. 10.16 m) above the minimum  
 633 stage of 1842 (the height today is 131.296 m above sea level of the Baltic system after equilibration —  
 634 Bpv). This height after deduction (i.e. 121.133 m above sea level Bpv) is 25 cm lower than the 1842  
 635 mark on the stone [HS3].

636

637

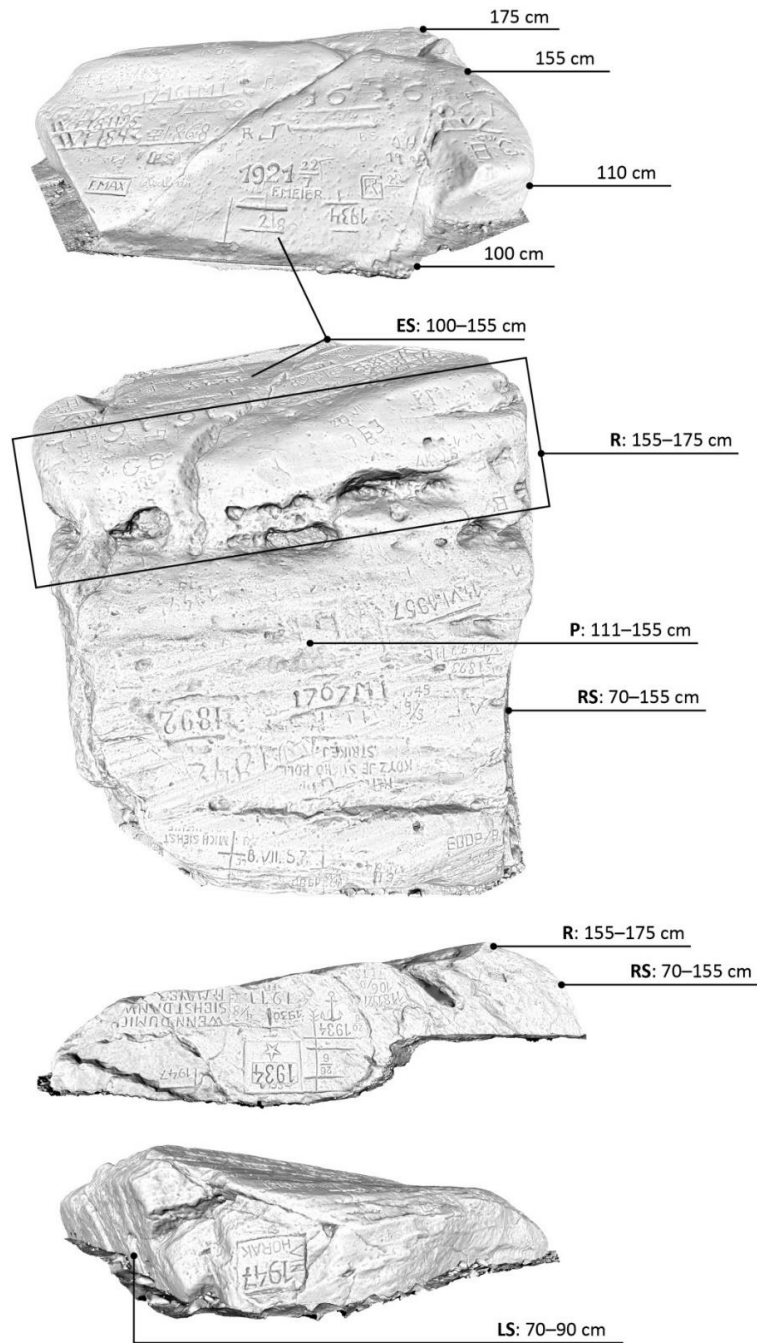

638  
 639 Fig.4 The hunger stone was divided into four height ranges (Table 4) and the following sides (from up to down):  
 640 embankment side [ES], the highest part of the stone's ridge [R], platform [P], right side [RS] and left side [LS].  
 641



642 Table 4 Overview of the annual water level minima on the hunger stones in Děčín

| Year | H D | HS2, H <sub>1842</sub>                                                              |      | HS1, H <sub>1842</sub> |      | HS3, H <sub>1842</sub> |      | H    | H <sub>1842</sub> | Time              | metres above sea level [m] | Position |        |
|------|-----|-------------------------------------------------------------------------------------|------|------------------------|------|------------------------|------|------|-------------------|-------------------|----------------------------|----------|--------|
|      |     | [']                                                                                 | [cm] | [']                    | [cm] | [']                    | [cm] | [cm] | [cm]              |                   |                            |          |        |
| 1516 |     | —                                                                                   | —    | —                      | —    | —                      | —    | 119  | -13               | —                 | 121.25                     | DZ       |        |
| 1517 |     | —                                                                                   | —    | —                      | —    | —                      | —    | 119  | -13               | —                 | 121.25                     | DZ       |        |
| 1536 | B   | —                                                                                   | —    | —                      | —    | —                      | —    | 138  | 6                 | —                 | 121.44                     | ES       |        |
| 1616 | B   | —                                                                                   | —    | —                      | —    | 5                      | 13   | 143  | 11                | VII, ??, [2?]     | 121.49                     | ES       |        |
| 1616 | B   | —                                                                                   | —    | —                      | —    | —                      | —    | 137  | 5                 | VII, ??, [2?]     | 121.43                     | ES       |        |
| 1706 |     | —                                                                                   | —    | —                      | —    | —                      | —    | 132  | 0                 | —                 | 121.38                     | DZ       |        |
| 1707 |     | —                                                                                   | —    | —                      | —    | —                      | —    | 139  | 6                 | VIII/IX?          | 121.45                     | ES       |        |
| 1719 |     | —                                                                                   | —    | 8.5                    | 22.1 | —                      | —    | 154  | 22.1              | —                 | 121.6                      | HS1      |        |
| 1746 | B   | —                                                                                   | —    | —                      | —    | ND                     | —    | 150  | 17                | VIII/IX?          | 121.56                     | ES       |        |
| 1766 |     | —                                                                                   | —    | 4.5                    | 11.7 | —                      | —    | 144  | 11.7              | ca 10.12.?        | 121.5                      | HS1      |        |
| 1782 |     | —                                                                                   | —    | 8.5                    | 22.1 | —                      | —    | 154  | 22.1              | ca 15.9.?         | 121.6                      | HS1      |        |
| 1790 | B   | —                                                                                   | —    | 6.5                    | 16.9 | ND                     | —    | 145  | 12                | ca 15.8.?         | 121.51                     | ES       |        |
| 1800 |     | 4,5                                                                                 | 11,7 | —                      | —    | —                      | —    | 142  | 10                | ca 18. 8. ?       | 121.48                     | ES       |        |
| 1811 | B   | —                                                                                   | —    | —                      | —    | —                      | —    | 139  | 6                 | <b>9. 8. (-1)</b> | 121.45                     | ES       |        |
| 1834 | B   | —                                                                                   | —    | 7                      | 18.4 | —                      | —    | 150  | 18,4              | 12. 8.?           | 121.56                     | HS1      |        |
| 1835 |     | —                                                                                   | —    | 5.5                    | 14.3 | ND                     | —    | 146  | 12                | ca 8. 9.?         | 121.52                     | DZ       |        |
| 1842 | B   | 0                                                                                   | 0    | 0                      | 0    | 0                      | 0    | 132  | 0                 | ca 25. 8.?, [2]   | 121.38                     | ES, P    |        |
| 1868 | B   | 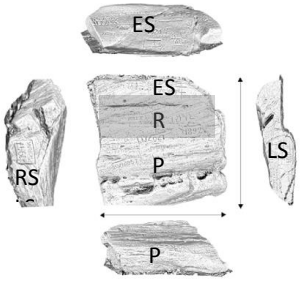 |      |                        |      |                        |      | 1868 | 133               | 1                 | ca 26.8. ?                 | 121.39   | ES     |
| 1874 |     |                                                                                     |      |                        |      |                        |      | 1874 | 128               | -4                | ca 1.12. ?                 | 121.34   | T      |
| 1892 |     |                                                                                     |      |                        |      |                        |      | 1892 | 137               | 5                 | 28. 8. (-5), [2]           | 121.43   | P      |
| 1893 |     |                                                                                     |      |                        |      |                        |      | 1893 | 135               | 3                 | 16.7.                      | 121.41   | P      |
| 1904 | B   |                                                                                     |      |                        |      |                        |      | 1904 | 112               | -21               | <b>23. 8. (-15), [5]</b>   | 121.18   | P      |
| 1911 | B   |                                                                                     |      |                        |      |                        |      | 1911 | 105               | -27               | <b>15. 8. (-7), [2]</b>    | 121.11   | LS     |
| 1921 | B   |                                                                                     |      |                        |      |                        |      | 1921 | 104               | -29               | <b>2. 8. (-9) **, [6]</b>  | 121.1    | ES, LS |
| 1930 |     |                                                                                     |      |                        |      |                        |      | 1930 | 101               | -32               | 10.9. (+2)                 | 121.07   | RS     |
| 1934 |     |                                                                                     |      |                        |      |                        |      | 1934 | 73                | -50               | 23.6. (0), [3]             | 120.79   | RS     |
| 1945 |     |                                                                                     |      |                        |      |                        |      | 1945 | 134*              | +2                | <b>9. 5. (—)</b>           | 121.4    | P      |
| 1947 | B   |                                                                                     |      |                        |      |                        |      | 1947 | 68                | -64               | 23.8. (0), [2]             | 120.74   | LS, RS |
| 1957 | B   |                                                                                     |      |                        |      |                        |      | 1957 | 110               | -22               | <b>8.7. (0), [2]</b>       | 121.16   | P      |
| 1990 | B   |                                                                                     |      |                        |      |                        |      | 1990 | 110               | -22               | 2.9. (0)                   | 121.16   | P      |
| 1963 |     |                                                                                     |      |                        |      |                        |      | 1963 | 175*              | +43               | (—)                        | 121.81   | R      |
| 2003 | B   |                                                                                     |      |                        |      |                        |      | 2003 | 111               | -21               | 111                        | 121.17   | P      |
| 2015 |     | 2015                                                                                | 86   | -46                    | 86   | 120.92                 | —    |      |                   |                   |                            |          |        |

643 *HS1 HS2, HS3 Hunger stones in Děčín, T HS in Těchlovice; DZ HS in Dolní Žleb; H<sub>1842</sub> water level relative to*  
 644 *the height of the mark of 1842 (levels below this mark are in red); H water level relative to the current Děčín*  
 645 *water gauge zero point (120.06 m above sea level); \* neither annual minimum (AM) nor local minimum (LM)*  
 646 *but an indication of contemporary water stage; \*\*the exact AM is denoted by the date of 11 August and*  
 647 *contemporary water level (a value) without any mark; Time, date of marked minimum, bold underline signifies*  
 648 *the exact day engraved in the stone, probable timing of the mark creation: (-) days before the annual minimum*  
 649 *water stage (+) after the annual minimum, ? uncertain value, ?? very rough estimation; [n] n is the total number*  
 650 *of marks in a year; the italic water level values are derived from another object, timing estimated from another*  
 651 *gauge; Position placement of DM on ES, RS, LS, P and R sides (Table 4), for derived data, the original objects*  
 652 *DZ or HS1 are highlighted, ND — mark registered but not surveyed (Protokoll, 1850)*

653 4.2.5.Hunger stone in Dolní Žleb (Niedergrund)

654 In the river map (Elbekarte, 1848), a total of 7 to 8 stones are marked on the right bank of the Elbe  
 655 River upstream of Dolní Žleb, followed by another 6 downstream, as indicated in the Protokoll (1842).  
 656 At the former customs house (left bank), the Elbe river flow was narrowed by two rock outcrops: the  
 657 Monk's Stone (Mönchstein) and the Mill Stone (Malstein), which were removed in 1858 (Protokoll,  
 658 1858). Not far from them, in the middle of the stream opposite the church, two stones were identified  
 659 in 1842 with the year ending in the figure '16' which was 12" under water (30 cm). Some sources  
 660 (*Neue Schriften*, 1843) date the marking back to 1516 or 1517. The Commission measured the depths  
 661 of the 1616, 1706 and 1842 minima (Table 5), further depth data were designed to be surveyed  
 662 accurately by geodetic levelling and then the stones would have been blasted off as an obstacle. The  
 663 regional literature (Focke, 1879; Pažourek, 1998) states that an inscription 'I A B R O 1516 — CB  
 664 1615 — VC 1634' should have been on the stone which meant '*Ich Andreas Beutel, Richter der Ortes*  
 665 *1516*', '*Christof Beutel 1615*' and '*Christof Vogel 1634*'. According to the latest field surveys (Table  
 666 6), a total of 11 hunger stones were found at the position of 730.55 to 732.01 km, one of them having  
 667 the year marking of 1842 (Randák, 2015, 2017a). Identification with the described stones is not yet  
 668 possible.

669 Table 5 Marks on a hunger stone in Dolní Žleb surveyed in 1842 (Protokoll, 1842)

| years       | $H_{1842}$ |      | $H_{DE}$ |
|-------------|------------|------|----------|
|             | "          | [cm] | [cm]     |
| <b>1516</b> | -5         | -13  | 119      |
| <b>1517</b> | -5         | -13  | 119*     |
| <b>1615</b> | ND         | —    | —        |
| <b>1616</b> | 2          | 5.2  | 137.2    |
| <b>1634</b> | ND         | —    | —        |
| <b>1706</b> | 0          | 0    | 132      |
| <b>1842</b> | 0          | 0    | 132      |

670  $H_{1842}$  DM water level relative to the level of DM1842,  $H_{DE}$  water level relative to the current Děčín water gauge,  
 671 \*report only (*Neue Schriften*, 1845), **ND** — mark registered but not surveyed (*Protokoll*, 1850).

672

673

674 Table 6 Hunger stones detected by Randák (2015, 2017a)

| No. | Km      | Description                                             |
|-----|---------|---------------------------------------------------------|
| 1   | 730.550 | 1904 (15. 8.)                                           |
| 2   | 730.780 | 1892, 'E. Dittrich'                                     |
| 3   | 730.82  | 1892, 'Ed. Ditr.'                                       |
| 4   | 730.830 | 1892, 1893 'E. H.', 'E. D.', heart motif                |
| 5   | 730.910 | 1921 ('F. H.' ?)                                        |
| 6   | 731.160 | 1892 'F. Hobe' or 'Hoke' ?                              |
| 7   | 731.260 | 1842,1868, 1892, 1904, 'V. Witr' ?, 'V. Hobe'           |
| 8   | 731.180 | 'HF' 1892, 1935                                         |
| 9   | 731.415 | 2015 '13.8.'                                            |
| 10  | 731.420 | 1904*                                                   |
| 11  | 731.01  | 1904* (at the house of the former ferryman H. Strasser) |

675 \* under water at the time of exploration, ? the inscription is unclear, **in grey** old DMs originated before 1892.

676

677 4.2.6.Hunger stones in Hřensko

678 None of the Commissions (1842, 1850 and 1858) identified a stone with a year indication. The survey  
 679 carried out by experts of the Elbe River Board on 26 August 2017 (flow rate  $75 \text{ m}^3 \cdot \text{s}^{-1}$ ) determined 14  
 680 objects with markings, all of which originated after the Commission in 1842 (Table 7).

681 Table 7 Hunger stones detected by Randák (2015)

| No. | Description of the hunger stone                                            |
|-----|----------------------------------------------------------------------------|
| 1   | 1928?, '5. 8. (19)? 28'                                                    |
| 2   | 1950, 'Kladno 1950'                                                        |
| 3   | <b>1874, 'K.R. 10/9. 1874'</b>                                             |
| 4   | 1904, 'H. Rausch1904'                                                      |
| 5   | ?, 'W.W F.D.N'                                                             |
| 6   | 1911, 1919, '1911', '1919', '3. 8. 1911 ER WK PP'                          |
| 7   | 1911, 'FC 1911'                                                            |
| 8   | 1892, '1892'                                                               |
| 9   | 1934 '1934'                                                                |
| 10  | 1928,1950, '1928', '1950', 'GW'                                            |
| 11  | 1927, 'N 1927'                                                             |
| 12  | 1927, '1927'                                                               |
| 13  | '1928', '1855 ', <i>many other inscriptions below the water level</i>      |
| 14  | '1904/ 22.7', '1934', <i>many other inscriptions below the water level</i> |

682 ? the inscription is unclear, **in grey** old DMs originated before 1892.

683

684 4.2.7. Hunger stone in Schmilka

685 On the right side upstream of Schmilka, the Commission (Protokoll, 1842) found a large stone with an  
 686 1842 mark (4. 9.), which was 4" (10 cm) below the then current water level. Further, an 1811 mark  
 687 was found that was placed 3" (7.5 cm) higher.

688

689 4.2.8. Hunger stone in Stadt Wehlen - Pötzscha

690 A mark from 1868 remains there today.

691

692 4.2.9. Hunger stones in Königstein

693 The Commission did not mention any remarkable stones there in 1842, 1850 or 1858. However,  
 694 German sources mention the year 1681, on another stone there are marks from 1797, 1914, 1865,  
 695 1900, 1911 and 1914  
 696 ([https://www.umwelt.sachsen.de/umwelt/wasser/download/Dokument\\_Hungersteine\\_und\\_Untiefen.pdf](https://www.umwelt.sachsen.de/umwelt/wasser/download/Dokument_Hungersteine_und_Untiefen.pdf)  
 697 f). In the locality opposite Prossen village is a stone that is most often mentioned. Today there are  
 698 readable inscriptions with dates of 1868 (20. 9.), 1928 (20. 7.), 1947 (20. 7.), 1963 (31. 7.) and 2003  
 699 (17. 7.). The lowest of these marks relates to 1868 with a correctly marked minimum (in Děčín the  
 700 minimum was on 19 September). The year 1947 was marked prematurely, which can explain why the  
 701 mark is the highest (in Děčín the difference between 20 July and the minimum on 11 August is 44  
 702 cm!). The year 1928 is marked quite correctly, although it is not an annual minimum (4. 8.) but the  
 703 difference is very small. On another stone there are newer data of 1963, 2003 and 2015.

704 4.2.9. Hunger stone in Pillnitz

705 None of the Commissions (1842, 1850 and 1858) found any remarkable stones there. However, the  
 706 Pillnitz site has been, next to Dresden and Meissen, a place of important flood level observations as  
 707 early as 1736 (Pötzsch, 1784). There is a clear inscription from 1778 which is probably not the  
 708 minimum water level (see discussion). The marked DM includes minima: 1893, 1904, 2003 and  
 709 2018).

710 4.2.10. Hunger stones in Pirna

711 This was located near a small gate at the navigation control point but this situation no longer exists.  
 712 Nearby, there was a transverse dam opposite to which a flat stone was to be seen, with engraved  
 713 marks. According to the Protokoll (1842), the marks of 1616, 1706, 1707, 1746, 1834 and 1835 were  
 714 registered and surveyed (the other marks were illegible). The water level at that time was 6" (0.13 m)  
 715 above the inscription 'Waserbau Direction 1842'. At the navigation office there was a water gauge  
 716 placed on the retaining wall for low water levels (up to 4 Saxon ell units) continuing on the building  
 717 (the higher part). The minimum of 1842 was at the level of -1 ell 22.5" (-1.08 m) below the zero point.  
 718 The water level during the measurement in 1842 (on 8 September) was at a height of -1 ell 16.5" (-  
 719 0.95 m). The difference between the marks of 1616 and 1842 was 5", as in Děčín. In 1850 (on 27  
 720 September), the water level of -1 ell (-0.57 m) was registered. The measurement was carried out at that  
 721 time at a water level 0.38 cm higher than in 1842. The previously described marks were as much as 51  
 722 cm below the water level. Therefore, there is no reference to a hunger stone here. In 1874 (at a time of  
 723 catastrophic drought), a new water gauge with a zero point at 110.94 m above sea level was set up; if  
 724 the zero point of the original water gauge was the same, the minimum in 1842 was at 109,856 m above  
 725 sea level. According to photographs of the current state, the inscription from 1842 and the marks of  
 726 1707 and 1790 were preserved, the marks of 1616 and 1746 were not found. In addition, there are  
 727 readable marks from 1782 and 1811. After 1842, the marks from 1859, 1863, 1868, 1873 and 1892  
 728 were added. The newer markings (1904, 1947 and 1952) are probably lower with regard to later  
 729 channel dredging while the marks of 1963 and 2003 were higher after the Vltava cascade was opened.  
 730 On the stone there are 5 scales for particular years including 1707, 1904, 1911, 1842 and 1952,  
 731 showing more minima in a year. In 2018, the stone was documented by SLUG Dresden experts and  
 732 the results were presented at a seminar on flood marks and minimum water levels in Jena in March  
 733 2019. There was an exchange of information between CHMI and SLUG. We provided a sketch of the  
 734 stone in Pirna, which was used to reconstruct the engraved signs that are exhibited today in the SLUG  
 735 building in Dresden.  
 736 ([https://www.thuringen.de/th8/tlug/presse\\_und\\_service/veranstaltungsmaterial/2019/01/index.aspx](https://www.thuringen.de/th8/tlug/presse_und_service/veranstaltungsmaterial/2019/01/index.aspx)).  
 737 The second, newer stone in Pirna has a mark from 1904.

738 Table 8 Marks on a hunger stone in Pirna surveyed in 1842 (Protokoll, 1842)

| years | H <sub>1842</sub> |      | H <sub>DE</sub> |
|-------|-------------------|------|-----------------|
|       | "                 | [cm] | [cm]            |
| 1616  | 5                 | 13   | 145             |
| 1706  | 11                | 28.6 | 161             |
| 1707  | 9                 | 23.4 | 155.4           |
| 1746  | 10                | 26   | 159             |
| 1834  | 9                 | 23.4 | 155.4           |
| 1835  | 9                 | 23.4 | 155.4           |
| 1842  | 0                 | 0    | 132             |

739 *H<sub>1842</sub> DM water level relative to the level of DM1842, H<sub>DE</sub> water level accommodation to present Děčín gauge*

740

741 4.2.11. Hunger stones in Dresden

742 None of the Commissions (1842, 1850 and 1858) mentioned any remarkable stones. Nevertheless,  
 743 pictures are published of hunger stones in the Kotta locality with an inscription of the year 1630 (it is  
 744 possible that it rather concerns 1636). We have no views regarding the credibility or existence of these  
 745 stones. In the Radebeul locality, there is probably a millstone with an inscription of the year 1911. In  
 746 the Laubegast locality, there are stones with inscriptions of the years 1892, 1893, 2003 and 2013. In  
 747 the Tolkewitz locality, there is a stone with a 2016 mark. In the Augustbrücke cross-section a low  
 748 water level of 1705 was indicated (Pötzsch, 1874) and now there is also a mark from 2018.

749 4.2.12. Hunger stone in Meissen

750 We learned about the hunger stone from older literature of the 18<sup>th</sup> century. None of the Commissions (1842,  
 751 1850 and 1858) found any remarkable stones. The only report on the flood marks is conveyed in literature.

752 Ursinus (1790) mentions a in dry year in 1746 (see Tables 4, 9, 10) and the discovery of various stones in the  
753 Elbe River. In Meissen year markings were found on one of these stones, indicating a dry year in 1654.

754

#### 755 4.2.13. Hunger stone in Strehla

756 The Protokoll (1842) describes a hunger stone (a rock rising from the river) on the right bank of the  
757 Elbe with minima from 1718, 1746, 1790, 1800, 1834 and 1835. The height of 1800 was 5" below the  
758 then current water stage. The water level at the Strehla water gauge in 1842 was -1 ell 15" (-0.91 m);  
759 in Riesa, the water level was -2 ells (-1.132 m) and in 1850 only -6" (-0.14 m) (Protokoll, 1842 and  
760 1850). This stone was probably removed, while another rock block called Nixstein, formerly dreaded  
761 by boatmen, remained there (at the left bank), where a depth of 1.60 m was measured in 1850. A  
762 somewhat problematically placed mark was made here in 2018 ([https://www.saechsische.de/eine-  
763 hungermarke-fuer-den-nixstein-4001437.html](https://www.saechsische.de/eine-hungermarke-fuer-den-nixstein-4001437.html)).

#### 764 4.2.14. Hunger stone in Schönbeck near Magdeburg

765 On 29 May 1858 the Committee recorded the water level at 4'5" (139 cm in accordance with the 1827-  
766 1888 Magdeburg series indicating the water stage at 141 cm). A board with the inscription marking 29  
767 August 1904 was removed from the river bank and placed in a museum.

#### 768 4.2.15. Notes on creating and specific details of the marks of water minima

769 There are always fewer records of low water levels (if any) than marks of high water stages, the only  
770 exception possibly being the sandstone Elbe valley between Děčín and Píma. It is more difficult to  
771 make a mark of the minimum water level than to make a flood mark, due to the following reasons:

772 (1) It is and it has always been difficult to estimate the correct instant of reaching the minimum level.  
773 More demanding inscriptions were probably made in advance; the designated place was probably  
774 enclosed by a small barrier beforehand so that the mark could be completed at a time when it was  
775 clear that the minimum had been reached, i.e. when the water was rising. Therefore, the logical  
776 moment of making the minimum mark is after the minimum has subsided (in reality, 1-15 days  
777 before the annual minimum level these DM levels were engraved; see Table 4). However, it is not  
778 clear whether this was a local or annual minimum.

779 (2) In some years, the level fell even lower. The exact date is given, or a range of water levels for a  
780 given year is made, such as in Děčín for the years 1904, 1921, 1930, 1934 and 1957. It is also  
781 surprising to note the range for the year 1707 in Píma, as otherwise the low-water mark might  
782 have been rather doubtful. The mark of 1842 in Píma seems to have a different meaning, being  
783 the actual water stage in feet.

784 (3) The minimum markings are often made upside-down (made from the upper side of the stone)  
785 while some were made while standing in the water or at a lower position (orientated normally).  
786 Therefore, the engraved lines in such cases are not below the date (in the graphic sense) but above  
787 it, thus closer to the water surface (in Děčín, for instance, these DMs: 1536, 1707, 1892, 1893,  
788 1904, 1911 and 1934).

789 (4) The marks are completed by monograms (see Pažourek, 1998). The oldest mark, from 1616, was  
790 completed by the initials F. L., from 1707 by the initials M. L. R., and from 1746 by the initials H.  
791 M. L., so there is a possibility that they concern members of one family. Later, in 1790, there are  
792 the initials H. G. T., in 1800 A. I., in 1811 and 1842 W. E., and the designation is missing for  
793 1821. Another change is the first year corresponding to the instrumental series, so in 1868 the  
794 initials are F. H., however in 1892 and relisted in 1893, the designation contains the initials U. E.  
795 The originator of other marks was probably the popular Franz Mayer, who is the author of the  
796 1904, 1911, 1921 and perhaps even the 1930 markings. In connection with the 1904 mark, the  
797 popular inscription 'Wenn du mich siehst dann weine', (If you see me, you will weep) was  
798 created. The last mark until the relocation of the original German population comes from 1934.

799 The originator of the first postwar mark was a Mr Horák. It is therefore evident that signs of low  
800 water levels were accompanied by specific habits.

801 (5) There are overlapping inscriptions. In view of the place of origin and various perhaps personal,  
802 local, national and even commercial considerations, there were exceptional cases of overlapping  
803 inscriptions. Thus the 1904 mark, perhaps made by a certain Rotsch, was obscured by the second  
804 inscription: 'Wenn du mich siehst dann weine, Fr. Mayer' relating to 1911.

### 805 4.3. Assessment of identified water level minima from 1516-2018

#### 806 4.3.1. Decade frequencies of 1500-1800

807 There are no direct water level observations for comparison purposes in the 1516-1727 period.  
808 According to Brázdil et al. (2013, 2015), the 1511-1520, 1531-1540 and 1631-1640 periods had a  
809 higher decade frequency ( $n = 6$  per decade) of drought reports. The coincidence of very low-lying DM  
810 marks ( $H = 110-140$  cm) in 1516, 1517, 1536, 1616 and 1636 with these three decades is evident from  
811 Fig. 5. Brázdil et al. (2015) selected several periods of intense drought for detailed processing on the  
812 basis of an analysis of documentary sources. The years 1534, 1536, 1540 (Wetter et al., 2014), 1590  
813 and 1616 were selected as extreme cases. In two cases (1536, 1616) there are documented DM marks,  
814 but three are missing. Even so, we can consider our documentation a good match. This result supports  
815 the credibility of the 1516 and 1517 marks, which have not been preserved or not yet documented,  
816 which we only know from the *Neue Schriften* (1845) and the report by Focke (1879). On the other  
817 hand, from 1536 to 1616, no record of water level minima exists in the set for 80 years, although  
818 minima of both extremes in 1540 and 1590 can be expected. From this period we can mention only the  
819 height of 1541 from the Rhine basin. However, in the 1560-1600 period, a very high frequency of  
820 floods is documented, with a recurrence period of 10 years or more ( $\geq Q_{10}$ ) (Elleder, 2015). Although  
821 the dry period does not exclude significant floods at all, in this case it concerned more frequent cases  
822 of floods of approximately  $Q_{20}$ . We can consider it a period with an average drought occurrence,  
823 where according to monthly rainfall indices at least the index -2 (very dry month) occurred in two or  
824 more consecutive months in 1555 (3 months), 1561 (2), 1562 (2), 1571 (3), 1581 (2), 1589 (2) and  
825 1590 (4). The index -3 (extremely dry month) occurred only once in 1569 (May) and in the dry year of  
826 1590 for two months (July and August) (Brázdil et al. 2013, 2015).

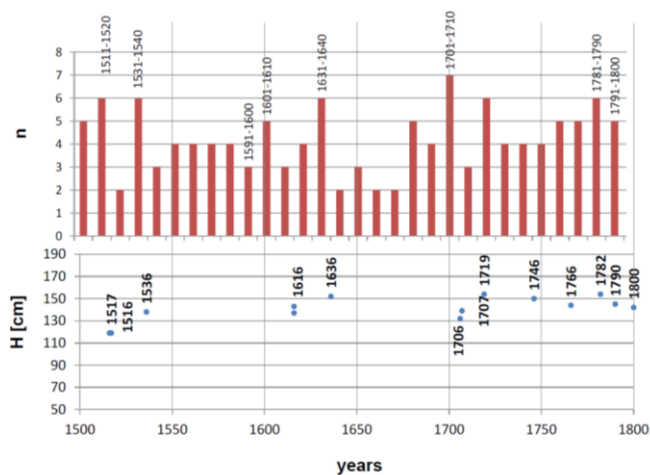

827

828 Fig. 5 Verification of marks of 1500-1800 according to the decade frequency of drought reports by Brázdil et al.  
829 (2013),  $n$  decadal frequencies of droughts,  $H[cm]$  water level of DM.

830 From 1636 to 1707, i.e. for 70 years, there are no marks of minimum water levels. Brázdil et al. (2013)  
831 pointed out that the three decades of 1641-1650, 1661-1670 and 1671-1680 had a minimum decade

832 occurrence of drought reports (2 cases per decade). Moreover, it is a period of the Maunder Minimum  
833 (Eddy, 1976), i.e. the 1640-1720 period, probably the most intensive period of the Little Ice Age  
834 (LIA).

835

#### 836 4.3.2. The Magdeburg series minima of 1727-1880

837 Since 1727, we have been able to identify the minima in the years highlighted in Fig. 6 with the help  
838 of the Magdeburg series. A very good time coincidence is apparent for 1746, 1766, 1782, 1790, 1800,  
839 1811, 1835, 1842, 1858 and 1874. The year 1868 is missing, thus there is no representation of a  
840 deviating minimum in Magdeburg; however there is a significant mark later, in 1869. The year 1766  
841 represents the only significant winter minimum which was marked on hunger stones. However, the  
842 winter minima of 1818, 1823 and 1862 are missing.

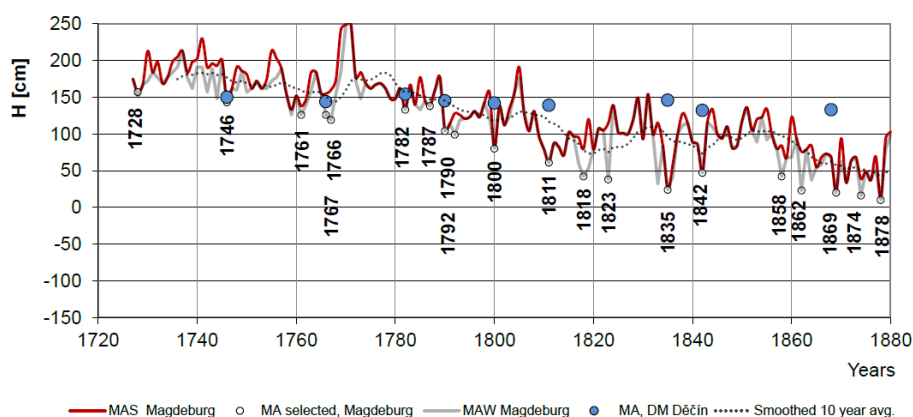

843

844 *Fig. 6 Verification of marks in the period of 1727-1800 according to the annual (grey line) and summer (red*  
845 *line) minima of the Magdeburg 1727-1800 series with annual minima identified (and derived) from the marks on*  
846 *the HS3 hunger stone in Děčín (blue circles).*

847

848 The water level DM minima are plotted in the water level scale of the current water gauge in Děčín. A  
849 coincidence regarding the water level (1746) is completely random (Fig. 6). However, there is a  
850 noticeable difference in the trend of annual lows of both series. We also emphasised the effect of the  
851 overall minima, so the graph also separates the winter minima, which show a downward trend, for  
852 example, just before 1746.

853 It is worth noting that the winter minimum of 1823 is not shown on the Elbe HSs but in view of the  
854 timing it corresponds to the low water levels of the Rhine. The only significant summer minima that  
855 are not documented on the HSs in the Czech part of the Elbe are around 1760, 1858 and 1878 (see the  
856 Discussion).

#### 857 4.3.3. The Děčín series minima of 1851-2018

858 If we compare the results with the Děčín series, i.e. with direct measurements in the vicinity of the  
859 HS3 hunger stone, the deviations of the marked and measured annual values are minimal. Until 1957,  
860 there are 11-year lows (not counting local minima) which we can evaluate and 8 of them have a  
861 deviation of less than 4 cm. A result of less than 5 cm is detected for the marks from 1911 (+7), 1921  
862 (+9), 1930 (+5), 1947 (-6 cm) and 1957 (+5) (see the graph in Fig. 7). In 1921, the local minimum was  
863 correctly marked; the annual minimum was not marked. The minima marked later, in 1963, 1981  
864 (missing in the figure), 1990 and 2003 are not as important as the older extremes. In their origination,

865 modern anthropogenic influences and partial misunderstandings of older traditions are manifested.  
866 This also applies to the prematurely made mark in Těchlovice. The 2003 mark is made well.

867 In conclusion, we can state a good match of the minima detected, which, moreover, are mostly  
868 representative of the largest extremes. However, this is not entirely true, as some years such as 1540,  
869 1590 and 1761 are missing. This is a great motivation for the next stage of work.

870

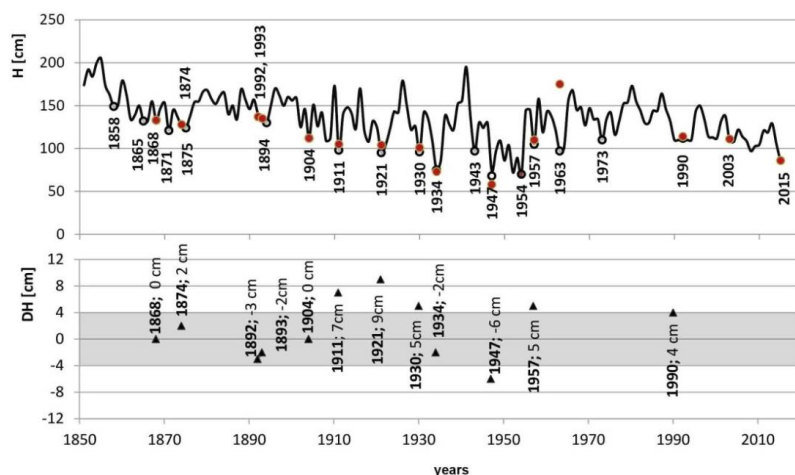

871

872 *Fig. 7 Coincidence of annual water level minima at the Děčín station and altitudes measured on the HS and HS3*  
873 *hunger stones in Děčín and Dolní Žleb.  $H$  is the water level.  $DH$  deviations are highlighted in the lower part of*  
874 *the graph. The precisely marked height (PMH) with deviations of 0-4cm is highlighted in grey, the outstanding*  
875 *marks are approximately marked heights (AMH) with deviations of 4-8 cm or more.*

876

## 877 5. Discussion

### 878 5.1. Credibility of minimum flow marks

879

880 There is no need to doubt the credibility of the low water level marks in Děčín from 1868 to 1957.  
881 When interpreting them, however, it is necessary to know the described changes, whether they are  
882 changes in the channel or flow rate enhancement due to the Vltava cascade. These are annual or local  
883 minima marked with the greatest possible care. It is also obvious that older marks in the 19<sup>th</sup> and 18<sup>th</sup>  
884 centuries were made in the same way and with the same intentions. Can this claim be extended to the  
885 past, i.e. to the 17<sup>th</sup> and 16<sup>th</sup> centuries, and is this finding valid for other hunger stones both in Bohemia  
886 and Saxony?

887 It would probably be appropriate to prove the connection of the high marks in Děčín, Dolní Žleb,  
888 Schmilka and Píma. However, when verifying the relationship between Píma and Děčín, we can  
889 compare only 4 concurrent records. These are the years 1616, 1707 and 1842. Since we use the  
890 relative difference to the water stage in 1842, we can only compare the three remaining heights of  
891 1616, 1707 and 1746. The relationships of 1616, 1707 and 1842 are linear; the water stage in 1746 is  
892 somewhat different, where the difference from the expected value is more than 10 cm. Perhaps only a  
893 local minimum (LM, not AM) was marked in Píma. However, we only use the published data from  
894 1842 and 1843 and it is not entirely certain that the commissioners found and surveyed the lowest



895 mark for a given year. Verification is still difficult; we do not see this mark on the current stone in  
896 Pirna-Oberposta.

897 We can recommend further field surveys in future (the next one especially in Dolní Žleb) and levelling  
898 and scanning of other objects, especially the stone in Pirna. For detailed analysis and a search for  
899 relics of older marks, it is impossible to rely solely on photographic documentation. Comparative older  
900 photographic material (Fig. 8) and detailed inspection of scanned 3D objects is required.

901

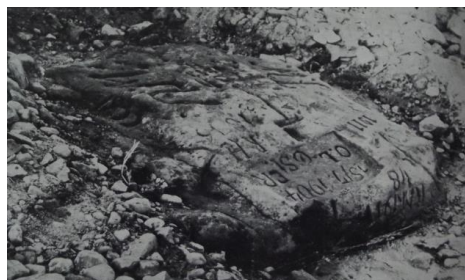

902

903 *Fig. 8. Picture from Český svět magazine, No 51 dated 25 August 1911. It shows a completely unknown hunger*  
904 *stone. The following years are engraved: 1835, 1904, 1911, 1873 and 1(?)76 (1576, 1876 or 1516?). This*  
905 *picture was found recently in the National Museum archive by Zvonimír Dragoun. The locality is unknown and*  
906 *the existence is also unverified.*

907

908 Since we can trust DM epigraphic sources, the only thing that remains is to point out other published  
909 sources from 1842-1843. These are compilations of the then measurements by the  
910 commissioners/hydro-technicians and possibly subsequent processing by the Statistical Office of the  
911 Kingdom of Saxony, or the Patriotic Economic Society of the Czech Kingdom, respectively. They  
912 point to other low levels that we expected and that could not be verified. This is, for example, the  
913 height of 1590. A report based on from the results of the Commission in 1842 and therefore the  
914 Protokoll (1842) appeared in *Adler Magazine* (No 13 dated 13 January 1843). There, the water level is  
915 reported in Dresden as 2 ells 3 inches below zero point and a series of low levels, of which we choose  
916 those that could not be documented in situ or verified in scientific literature: 1590, 1634, 1635, 1637,  
917 1660, 1666, 1669, 1678, 1681, 1686, 1705, 1716, 1718, 1726, 1761, 1789 and 1794. Another  
918 remarkable source is an article in the Prague summary report *Encyklopädische Zeitschrift des*  
919 *Gewerbewesens* (3<sup>rd</sup> edition of the new series from 1843, *Statistik der Gewerbe und Handel*, pp. 86-  
920 93), which draws on the *Preussisch Staat Zeitung* Nr. 354. The same data were published in a more  
921 popular way in educational journals such as 'Das Pfennig Magazine für Belerung und Untrehaltung'  
922 (1843, 11 March, No 10). The exact heights published there are given in Table 9. The *Gewerbe Blatt*  
923 *für Sachsen* (No 5/1843, <https://digital.slub-dresden.de/werkansicht/dlf/69679/1/>), a technical  
924 magazine, states in the explanatory note that the minimum mark of 1590 was indistinctly recognised  
925 on an unnamed hunger stone or object in Rathen between HS in Königstein and HS in Stadt Wehlen-  
926 Pötzcha. It is not clear whether the mark was too deep or was unreadable and its height was therefore  
927 not stated.

928

929

930

931

932

933

934 Table 9 An overview of the Saxon DM-type sources (edition of the new series from 1843, *Statistik der*  
 935 *Gewerbe und Handel*, pp. 86-93)

| Year | Saxony<br>H <sub>1842</sub> |      |      | Pir<br>H <sub>1842</sub> | Sch<br>H <sub>184</sub> | Str<br>H <sub>184</sub> | H <sub>DE</sub> |
|------|-----------------------------|------|------|--------------------------|-------------------------|-------------------------|-----------------|
|      | [""]                        | [""] | [cm] | [cm]                     | [cm]                    | [cm]                    | m. a. s. l.     |
| 1615 | 17.5                        |      | 45.7 | —                        | —                       | —                       | 177.7           |
| 1616 | 3.5                         | 0.5  | 9.1  | 13                       | —                       | —                       | 141.1           |
| 1635 | 9                           |      | 23.5 | —                        | —                       | —                       | 155.5           |
| 1636 | 8                           |      | 20.9 | —                        | —                       | —                       | 152.9           |
| 1705 | 11                          |      | 28.7 | —                        | —                       | —                       | 160.7           |
| 1706 |                             |      | —    | 28.6                     | —                       | —                       |                 |
| 1707 | 4.5                         | 0.5  | 11.8 | 23.4, E                  | —                       | —                       | 143.8           |
| 1718 |                             |      | —    | —                        | —                       | ND                      |                 |
| 1746 | 10                          |      | 26.1 | 17                       | —                       | ND                      | 158.1           |
| 1761 | 5.5                         | 0.5  | 14.4 | —                        | —                       | —                       | 146.4           |
| 1782 | 11                          |      | 28.7 | E                        | —                       | —                       | 160.7           |
| 1789 | 14                          |      | 36.5 | —                        | —                       | —                       | 168.5           |
| 1790 | 6                           |      | 15.7 | —                        | —                       | ND                      | 147.7           |
| 1794 | 11                          |      | 28.7 | —                        | —                       | ND                      | 160.7           |
| 1800 | 8                           |      | 20.9 | E                        | —                       | —                       | 152.9           |
| 1811 | 6                           |      | 15.7 | E                        | 7.5                     | —                       | 147.7           |
| 1811 | 6.5                         | 0.5  | 17.0 | E                        | —                       | —                       | 149.0           |
| 1834 | 8                           |      | 20.9 | 23.4                     | —                       | ND                      | 152.9           |
| 1835 | 8                           |      | 20.9 | 23.4                     | —                       | ND                      | 152.9           |
| 1842 | 0                           |      | 0    | 0,E                      | 0                       | —                       | 132             |

936

937 *Saxon inches ["] and line units ["]*, **Pir** Pirna HS, **Sch** Schmilka HS, **Str** Strehla HS, **H<sub>1842</sub>** DM water level  
 938 *relative to the level of DM1842, E existence is verified, H<sub>DE</sub> water level relative to the current Děčín water*  
 939 *gauge, ND mark registered but not surveyed.*

940 If we take this source into account, and we combine this data with the data already presented, we find  
 941 a slight shift somewhere, but the overall picture and trend confirm information on the minima of water  
 942 levels from hunger stones in Bohemia. Another source is the report of the Patriotic Economic Society  
 943 (*Neue Schriften*, 1845) where a forester and observer of the Děčín-Podmokly station gave the exact  
 944 height of the marks (Table 10). This is partly a compilation of the heights from Děčín and Dolní Žleb;  
 945 the data are very similar or the same (1616, 1707, 1746, 1811, 1835 and 1842). Differences of more  
 946 than 8 cm are shown only by the DM of 1766, minor differences are seen in the years 1782, 1790 and  
 947 1800. However, there are also data for 1834, 1516 and 1517. To complement the Děčín data, the  
 948 minima of 1516 and 1517 were mainly used. We assume that, as a forester and a meteorological  
 949 observer, A. Seidel could supplement the report of the commissioners (who had only limited time to  
 950 survey) from his own examinations in Dolní Žleb and Děčín, where he lived. The years 1516 and  
 951 especially 1517 were very dry, as evidenced by contemporary descriptions in the Old Czech  
 952 Chronicles (SLČ), in particular, describing rather meteorological and phenological parameters of  
 953 drought (e.g. harvest occurring as early as on 29 June).

954

955

956

957

958

959  
960  
961  
962

Table 10 Compilaton of the Czech DMs (*Neue Schriften*,1845)

| Year | H <sub>1842</sub> |                  |              | Comparison with objects on the Czech side |                            |
|------|-------------------|------------------|--------------|-------------------------------------------|----------------------------|
|      | Inch<br>["]       | Line<br>unit ["] | Cm           | H <sub>1842</sub>                         | Object HS and<br>(sources) |
|      |                   |                  |              | [cm]                                      |                            |
| 1516 | -5                |                  | <b>-13.1</b> | -13                                       | DZ, (NS,P)                 |
| 1517 | -5                |                  | <b>-13.1</b> | -13                                       | DZ,(NS)                    |
| 1616 | 4                 | 4                | <b>11.3</b>  | 11                                        | <b>HS3, (L)</b>            |
| 1707 | 3                 | 4                | <b>8.7</b>   | 6                                         | <b>HS3, (L)</b>            |
| 1746 | 6                 | 6                | <b>17.0</b>  | 17                                        | <b>HS3, (L)</b>            |
| 1766 | 10                | 2                | <b>26.5</b>  | 11.7                                      | HS1, (P)                   |
| 1782 | 6                 | 8                | <b>17.4</b>  | 22.1                                      | HS1, (P)                   |
| 1790 | 6                 | 6                | <b>17.0</b>  | 12                                        | <b>HS3, (L)</b>            |
| 1800 | 6                 | 10               | <b>17.9</b>  | 10                                        | <b>HS3, (L)</b>            |
| 1811 | 3                 | 1                | <b>8.0</b>   | 6                                         | <b>HS3, (L)</b>            |
| 1834 | 7                 | 0                | <b>18.3</b>  | 18.3                                      | HS1, (P)                   |
| 1835 | 6                 | 0                | <b>15.7</b>  | 14.4                                      | HS1,(P)                    |
| 1842 | 0                 | 0                | <b>0.0</b>   | 0                                         | HS3, (P)                   |

963 *Austrian inches ["] and line units ["]*, H<sub>1842</sub> DM water level relative to the level of DM1842, **Object HS, HSI,**  
964 **HS2, HS 3** hunger stones in Děčín (Table 4) or in **DZ** Dolní Žleb (Table 5), (X) sources of data **P** Protokoll  
965 (1842), **NS** Neue Schriften (1845) and **L** levelling and surveying in 2015 (Table 4); very good agreement is  
966 denoted **in grey**.

## 967 5.2. Bad and doubtful markings

968 In the promotional photographs issued as postcards we can find supposed minima marks that do not  
969 correspond to the reality (correction in parentheses) such as the years 1745 (1746) and 1858 (1868).  
970 The often published postcard with a lady in a hat by E. Rennert (as in Brázdil et al., 2015, 2019a) and  
971 an article in the regional anthology (Pažourek, 1998) indicate an inscription from 1417 in the left part  
972 of the plateau at the river. Is this possibly a misinterpretation or is this a complete forgery? In these  
973 places, there is now an inscription from 2003, but there is no indication that there is any mark, not to  
974 mention that the date would necessarily have been made using Roman numerals. There were once  
975 completely or partially wiped out inscriptions of the minimum of 1904 and the inscription '1904  
976 Weh', or 'misery' or 'suffering'. These inscriptions have virtually disappeared.

977 In the river side of Pillnitz Castle there are signs including a year marking of 1778. By comparison  
978 with the mark heights in Magdeburg and the descriptions in documentary sources it can be considered  
979 rather to mark the year of repairing the castle in 1778 or even the anniversary of its founding in 1718.  
980 But then it should be marked as 1718.

## 981 5.3. Probable connections between flood marks and hunger stones in Pirna and Děčín

982 It is remarkable that we find virtually the same tradition and the same DM marks in Děčín and Pirna  
983 on the Saxon and the Czech sides. At that time, from the 13<sup>th</sup> to the beginning of the 15<sup>th</sup> century,  
984 today's Saxon Pirna was part of Bohemia. In 1432 the towns were hit by a catastrophic flood, the  
985 height of which is marked in Děčín next to the RG1 rock water gauge. In 1515, Děčín became the  
986 property of aristocratic families from neighbouring Saxony, first of the Lords of Salhausen and from  
987 1534 onward of Büнау (Schattkowsky, 2003). Until 1628, i.e. for 94 years, this family was in  
988 possession of the Děčín and Weesenstein estates in the vicinity of Pirna. At that time, the oldest  
989 identified low-level signs of 1536 and 1616 were made on the HS3 stone in Děčín. The of low water

990 levels of 1516 and 1517 are only documented in literature (*Neue Schriften*, 1845), i.e. at the time of the  
 991 Salhausens. With the beginning of the Thirty Years' War (1618-1648) and re-Catholicisation in  
 992 Bohemia in 1626 Pirna became the centre of Czech exiles. It is evident that Děčín and Pirna are bound  
 993 by one river, chain-boat navigation and partly by common history. It is therefore not surprising that we  
 994 find an analogy in the area of the documentation of flow minima.

995 **5.4. Relationship between the Rhine and Elbe minima**

996 The alluvial-pluvial regime of the Rhine predetermines the seasonality of the Rhine minima, which  
 997 occur rather in autumn and winter. This is mostly later than on the Elbe, where there are mostly  
 998 summer minima. The very dry period of 1536 to 1541 is defined particularly by the Elbe and Rhine  
 999 minima (Table 11 a, b). The mark of 1654 in Meissen is known only from literature, in which there are  
 1000 also a number of reports from the Rhine basin. An almost perfect concurrence is represented by the  
 1001 minima of 1766 and 1767. The very warm and dry period of 1790-1794 was evident in both river  
 1002 basins. The lows also coincide in 1800 and 1858. In the Rhine basin, the drought was more significant.  
 1003 In the Elbe river basin, the catastrophic flood changed the situation at the end of July and beginning of  
 1004 August, which affected the upper Elbe basin and mainly the Krkonoše and Krušné hory mountain  
 1005 areas (Elleder, 2015).

1006 Table 11a Documentation of minimum water levels in the Rhine basin according to Wittman (1859),  
 1007 and of the Elbe minima on the basis of documented DM marks (1303-1755)

|             | <b>Elbe</b>    | <b>Rhine</b>                                                                                      |
|-------------|----------------|---------------------------------------------------------------------------------------------------|
| <b>1303</b> | —              | Olten, Strasburg. (W)                                                                             |
| <b>1516</b> | DM, DZ         | —                                                                                                 |
| <b>1517</b> | DM, DZ         | —                                                                                                 |
| <b>1521</b> | —              | DM Unkelstein, (BT)                                                                               |
| <b>1536</b> | DM, DE         | —                                                                                                 |
| <b>1541</b> | —              | DM Laufenstein, (W)                                                                               |
| <b>1544</b> | DM STA (W)     | —                                                                                                 |
| <b>1567</b> | —              | DM Unkelstein, (BT)                                                                               |
| <b>1590</b> | DM RA          | —                                                                                                 |
| <b>1615</b> | DM DE, Sax     | —                                                                                                 |
| <b>1616</b> | DM DE, Sax     | —                                                                                                 |
| <b>1627</b> | DM Sax         | —                                                                                                 |
| <b>1631</b> | DM Sax         | —                                                                                                 |
| <b>1634</b> | DM DZ          | —                                                                                                 |
| <b>1635</b> | DM Sax         | —                                                                                                 |
| <b>1636</b> | DM Sax         | —                                                                                                 |
| <b>1637</b> | DM Sax         | —                                                                                                 |
| <b>1639</b> | —              | DM Unkelstein, (BT)                                                                               |
| <b>1654</b> | DM ME          | Bacharach (25 people stood on the Altarstein to show how much the water level had decreased), (W) |
| <b>1660</b> | DM Sax         | —                                                                                                 |
| <b>1666</b> | DM STA, Sax    | —                                                                                                 |
| <b>1672</b> | —              | Olten, Staad, Konstanz (Horn), (W)                                                                |
| <b>1678</b> | DM Sax         | —                                                                                                 |
| <b>1681</b> | DM, KO         | —                                                                                                 |
| <b>1686</b> | DM Sax         | —                                                                                                 |
| <b>1692</b> | —              | DM Laufenstein, (W)                                                                               |
| <b>1704</b> | —              | DM St. Goar. (W)                                                                                  |
| <b>1705</b> | DM Sax         | —                                                                                                 |
| <b>1706</b> | DM DE, Pl, Sax | —                                                                                                 |
| <b>1707</b> | DM DE, Pl, Sax | —                                                                                                 |
| <b>1718</b> | DM ST          | —                                                                                                 |
| <b>1719</b> | DM DE          | —                                                                                                 |
| <b>1725</b> | —              | DM Mammern, DM Konstanz, (W)                                                                      |
| <b>1726</b> | DM Sax         | —                                                                                                 |
| <b>1746</b> | DM DE, Pl, ST  | —                                                                                                 |

|      |   |                                                    |
|------|---|----------------------------------------------------|
| 1749 | — | DM Rheinau, (W)                                    |
| 1750 | — | DM Laufenstein ,Kolln – bridge pillars, Bacharach, |

1008

1009

1010

1011 Table 11b Documentation of minimum water levels in the Rhine basin according to Wittman (1859), and of the  
1012 Elbe minima on the basis of documented DM marks (1755-1858)

|      | Elbe               | Rhine                                            |
|------|--------------------|--------------------------------------------------|
| 1755 | —                  | DM Mammelbach, (W)                               |
| 1761 | DM Sax, (GBS)      |                                                  |
| 1766 | DM DE              | —                                                |
| 1767 | —                  | Kolln, bridge pillars, (W)                       |
| 1782 | DM DE, PI, Sax     | —                                                |
| 1785 | —                  | DM Mammebach, (W)                                |
| 1789 | DM Sax (ND), (GBS) |                                                  |
| 1790 | DM DE, ST,         | —                                                |
| 1792 | —                  | The lowest stage in Bodensee, Mammern, (W)       |
| 1800 | DM DE, SCH, PI, ST | The lowest stage of the Rhine in 30 years, Mainz |
| 1811 | DM, DE, PI         | —                                                |
| 1823 | —                  | Very low water stage of the Rhine                |
| 1834 | DM DE, PI, ST      | —                                                |
| 1835 | DM DE, PI, ST      | —                                                |
| 1842 | DM DE, DZ, PI      | —                                                |
| 1848 | —                  | DM Laufenstein, (W)                              |
| 1858 | DM Pima            | The lowest stage of the Rhine, (W)               |

1013 *DM* drought mark, *DE* Děčín (Table 4), *DZ* Dolní Žleb (Table 5), *SCH* Schmilka, *KO* Königstein, *PI* Pirna, *ME*  
1014 *Meissen*, *STA* Stade, and *Sax* Saxony (Table 9). Other sources in brackets *GBS* (Gewerbe Blatt für Sachsen No  
1015 5, 1843), *W* (Wittmann, 1859), *BT* (Börngen, Tetzlaff, 2001).

1016 A comparison of the duration of the tradition of making minimum markings in the Rhine and Elbe  
1017 basins does not clearly indicate a longer tradition in either area. What is more interesting is a graphical  
1018 overview of data from the Czech and Saxon DM sources (Fig. 9). It is apparent that the downward  
1019 trend pointed out by reputed geographers and water managers (Burghaus, Grebenau, Wex, Harlacher  
1020 and others) in the measured series has been apparent since about 1746, even at the lows recorded on  
1021 hunger stones. In the case of Děčín, it is clear that during the coldest period of the LIA, the Maunder  
1022 Minimum (Eddy, 1976) could have had a positive effect on the Elbe runoff, although, for example,  
1023 Ogurtsov (2019) illustrates an even deeper minimum in the first half of the 15<sup>th</sup> century.

1024

1025

1026

1027

1028

1029

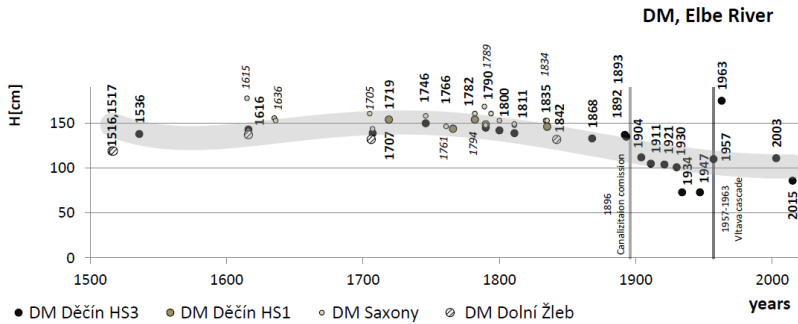

1030

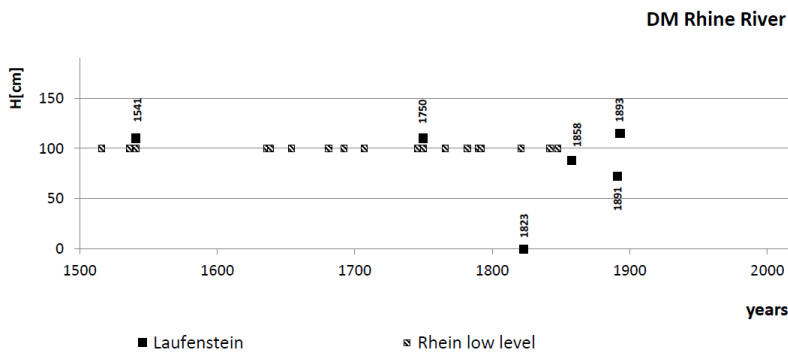

1031

1032 *Fig. 9 Graphical overview of DM data from the Czech and Saxon areas (upper part). The black and grey circles*  
 1033 *represent the DM minima derived from the hunger stone in Děčín, the hatched circles relate to the stone in*  
 1034 *Dolní Žleb. This ensemble is completed by minima from the Saxon data (small circles), source (Table 9). The*  
 1035 *grey line highlights the trend of DM minima. Graphical overview of DM data from the Rhine basin (lower part).*  
 1036 *Water level minima derived from the Laufenstein DM (black rectangles), other epigraphic documentation*  
 1037 *(hatched rectangles) (Tables 11a, b).*

1038 Unfortunately, the marks of 1516 and 1517 and their positions are known only through the testimony  
 1039 of A. Seidl of Děčín and from an indication in the Protokoll (1842). However, the positions of the  
 1040 1536 and 1616 marks increase their credibility. The downward trend since 1746 in Děčín cannot be  
 1041 explained only by hypothetical deepening of the profile or as a result of the artificial shortening of the  
 1042 Elbe in the case of Dresden and Magdeburg. The fact that the runoff may have been comparable to the  
 1043 period after 1842 and even lower, before the onset of the Maunder Minimum, may be useful  
 1044 knowledge about the status of the basic flow and the status of groundwater. In the case of the Rhine  
 1045 we have very little data available. The existing information, however, do not contradict previous  
 1046 considerations. Again, there are two important time points, the years of 1541 and 1750. The  
 1047 interpretation of other reports on hydrological drought from the Maunder Minimum period is a matter  
 1048 of future studies.

## 1049 6. Conclusion

1050 Hunger stones with low-water marks are a phenomenon that has been and is regionally limited to the  
 1051 Upper Rhine basin and the Elbe River. In other regional areas, we have not been able to find an  
 1052 analogous activity where, for centuries, minimum water levels would have been marked. In the Rhine  
 1053 basin, the water level of Lake Constance (Bodensee) and the Rhine level in the area downstream of the  
 1054 confluence with the Aare River to Cologne were marked. While very few of the former objects with  
 1055 low-level marks are available in the Rhine basin, the situation is still favourable in the sandstone part

1056 of the Elbe canyon from Děčín to Pírna and its surroundings. There are at least 27 objects on the  
1057 Czech side and at least 10 stones on the German side, mainly with signs dating mostly from the 20<sup>th</sup>  
1058 century. Still, several of them are part of an older tradition prior to 1892 or 1842. Of these, we can  
1059 only be sure of the stones in Těchlovice, Děčín, Dolní Žleb, Hřensko and Pírna. According to the  
1060 existing findings, the oldest marks from the 17<sup>th</sup> and 18<sup>th</sup> centuries have been preserved only in Děčín  
1061 and Pírna, even though they used to be in several places, and we are not sure about Dolní Žleb. A  
1062 number of stones in the navigation route, including the hunger stones, were recommended for blasting  
1063 by navigation committees in 1842 and 1850.

1064 The situation in Děčín and Pírna in particular is exceptional. It consists in the existence of very old  
1065 records of minimum water levels and the existence of old records of water levels. In Děčín, moreover,  
1066 the 590-year-old flood marks and the 490-year-old low-water marks are combined in one logical  
1067 complex. It is evident that the motivation for making the low-water marks was related to navigation  
1068 conditions in the Elbe canyon. In fact, this tradition was made possible by the availability of the local  
1069 material, sandstone in the form of rocky outcrops or boulders, into which the marks could easily be  
1070 cut, engraved or painted. The minimum signs on the individual objects in Děčín are related to the  
1071 dedicated water gauges and markings of the navigation depth, which was about 93 cm for a half load  
1072 and 130 cm for full navigability around 1842. The old rock water gauge for high- and low-water levels  
1073 and its projection on the first of the three Děčín stones served the safe loading and passing as well as  
1074 the subsequent water gauge in the city.

1075 We have shown that the years with marks or crosses are credible evidence of the occurrence of flow  
1076 rate minima, mostly annual minima. If there were other minima in the year, additional lines were  
1077 made, forming an occasional water gauge for the given year. Obviously, the originators' efforts were  
1078 to capture the annual minimum as accurately as possible, and the guarantee of reliability was often  
1079 their signature, name or initials. The marks correspond to the measured water levels of the systematic  
1080 series and are relatively representative of the important minima of the Magdeburg 1727-1880 and  
1081 Děčín 1851-2019 series. The correlation of the 1868, 1892, 1893, 1904, 1911, 1921, 1928, 1930, 1934,  
1082 1947 and 1957 markings (DM) in Děčín with the series of measurements mostly shows a match with  
1083 differences of less than 4 cm, or exceptionally, greater. Therefore, we assume the same accuracy, i.e.  
1084 compliance with real minima at the same level, for marks from the 1516-1867 period.

1085 According to the observed water level minima in the 16<sup>th</sup> and early 17<sup>th</sup> centuries, the minima were at  
1086 the same and probably at an even lower level than 1842. No completely reliable water level minima  
1087 marks are yet available for the Maunder Minimum (MM) period in the Czech territory. The marks of  
1088 1654 (Meissen) and 1681 (Konigstein) are documented only by more remote literature and their height  
1089 is unknown. The exceptions are the marks at the end of the MM in 1706 and 1707. The levelling  
1090 measurement of the marks on two stones and creation of a 3D model of the Děčín stone by scanning  
1091 have helped us to understand the tradition of water level recording, to rehabilitate the value of marks  
1092 on hunger stones and to bring new, very reliable data on the occurrence of hydrological drought in the  
1093 historical period.

1094 However, many other questions have also emerged from the survey. The question is not whether it  
1095 makes sense to document the DM marks, but rather how much of the former collection remained after  
1096 regulating the Elbe and operating chain-boat navigation locally. We are confident that further field and  
1097 archive research will bring an opportunity to obtain valuable data on hydrological droughts in the past.  
1098 The profitability of the resources and time spent on exploration and processing is evident.

1099

1100

1101

1102

1103

1104

1105 **Data availability.** The measurement records and the survey notebook data such as historical records  
1106 of Magdeburg, Dresden and Prague that were used in the paper are available from the corresponding  
1107 authors.

1108 **Competing interests.** The authors declare that they have no conflicts of interest.

1109 **Author contributions.** LE prepared the archive and historical sources. LE and LK prepared the field  
1110 survey and measurement. TK analysed the object of HS with MeshLab software and JŠ worked with  
1111 GIS applications and prepared maps and illustrations. All the authors participated in interpretation of  
1112 the field data and the results.

1113  
1114 **Special issue statement.** This article is part of the special issue ‘Droughts over centuries: what can  
1115 documentary evidence tell us about drought variability, severity and human responses?’. It is not  
1116 associated with a conference.

#### 1117 **Acknowledgement**

1118 We thank Zvonimir Dragoun for geodetic surveying of the flood marks in 2004 and 2005 along the  
1119 Elbe between Mělník and Děčín and of the low-water marks later in 2015. We give sincere thanks to  
1120 Mr O. Kotyza from the Litoměřice Museum for numerous friendly consultations and advice, as well as  
1121 to the Director of the Museum in Děčín, Mr Pažourek and Mrs H. Slavičková from the Regional  
1122 Archive in Děčín for their great willingness to help and for their consultations. It is impossible to  
1123 imagine our study without the hard work and interest of Mr Randák’s team from the Elbe River  
1124 Administration. The friendly advice and persistent optimism and interest of Mrs Zlata Šámalová was a  
1125 source of valuable information as well as energy. We also thank our colleagues from the SLUG  
1126 Dresden. At last but not least, we thank Mr V. Dvořák for the translation, Neil Macdonald and an  
1127 unknown reviewer for their valuable improvements to the text and Erin Naillon for her excellent help  
1128 in proofreading the entire document.

1129

1130

#### 1131 **References**

1132 Benito, G., Lang, M., Barriandos, M., Llasat, M.C., Frances, F., Ouarda, T., Thorndycraft, V., Enzel,  
1133 Y., Bardossy, A., Coeur, D., Bobe’e, B.: Use of systematic paleoflood and historical data for the  
1134 improvement of flood risk estimation. Review of scientific methods. Nat Hazards 31, 623–643, 2004.

1135 Benito, G., Brázdil, R., Herget, J., and Machado, M. J.: Quantitative historical hydrology in Europe.  
1136 Hydrol. Earth Syst. Sci., 19, 3517–3539, 2015.

1137 Berg von, D. Veränderung des Wasserstandes der Flüsse und ihre Ursachen, Kritische Blätter für  
1138 Forst und Jagdwirtschaft, B.50, H. 1, s. 158–191, 1867.

1139 Berghaus, H.: Hydro-historische Uebersicht vom Zustande des Elbstromes innerhalb eines Hundert  
1140 und achtjährigen Zeitraums von 1728 bis 1835 in Annalen der Erd-, Völker-, und Staatenkunde,  
1141 Zweiter Band, Heft 5. G. Reiner. Berlin, 386–406, 1836.

1142 Berghaus H.: Hydrographische Beschreibung des Elbestroms in Landbuch der Mark Brandenburg und  
1143 des Markgrathums Nieder- Lausitz in der Mitte des 19. Jahrhunderts oder der geographisch-  
1144 historisch-statistische Beschreibung. Erster Band, Adolph Müller, Brandenburg, 301–326, 1854.

Naformátováno: Barva písma: Text 1



- 1145 Brázdil, R., Dobrovolný P., Elleder, L., Kakos, V., Kotyza, O., Květoň, V., Macková, J., Štekl V.,  
1146 Tolasz R., Valášek, H.: Historické a současné povodně v České republice, Masarykova Univerzita v  
1147 Brně a Český hydrometeorologický ústav v Praze, 369, Brno, Praha 2005.
- 1148 Brázdil, R., Bělinová, M., Dobrovolný, P., Mikšovský, J., Pišoft, P., Řezníčková, L., Štěpánek, P.,  
1149 Valášek, H., Zahradníček, P.: Temperature a Precipitation Fluctuations in the Czech Lands During the  
1150 Instrumental Period. Masaryk University, Brno, 236, ISBN 978-80-210-6052-4, 2012.
- 1151 Brázdil, R., Dobrovolný, P., Trnka, M., Kotyza, O., Řezníčková, L., Valášek, H., Zahradníček, P., and  
1152 Štěpánek, P.: Droughts in the Czech Lands, 1090–2012 AD, *Clim. Past*, 9, 1985–2002,  
1153 <https://doi.org/10.5194/cp-9-1985-2013>, 2013.
- 1154 Brázdil, R. Trnka M., et al. 2015. Sucho v českých zemích: minulost, současnost, budoucnost, centrum  
1155 výzkumu globální změny, akademie věd ČR, Brno, 400, 2015
- 1156 Brázdil, R., Kiss, A., Luterbacher, J., Nash, D. J., and Řezníčková, L.: Documentary data and the  
1157 study of past droughts: a global state of the art, *Clim. Past*, 14, 1915–1960, [https://doi.org/10.5194/cp-](https://doi.org/10.5194/cp-14-1915-2018)  
1158 [14-1915-2018](https://doi.org/10.5194/cp-14-1915-2018), 2018.  
1159
- 1160 Brázdil, R., Demarée, G. R., Kiss, A., Dobrovolný, P., Chromá, K., Trnka, M., Dolák, L., Řezníčková,  
1161 L., Zahradníček, P., Limanowka, D., and Jourdain, S.: The extreme drought of 1842 in Europe as  
1162 described by both documentary data and instrumental measurements, *Clim. Past Discuss.*,  
1163 <https://doi.org/10.5194/cp-2019-77>, in review, 2019a.
- 1164 Brázdil, R., Dobrovolný, P., Trnka, M., Řezníčková, L., Dolák, L., and Kotyza, O.: Extreme droughts  
1165 and human responses to them: the Czech Lands in the pre-instrumental period, *Clim. Past*, 15, 1–24,  
1166 <https://doi.org/10.5194/cp-15-1-2019>, 2019b.  
1167
- 1168 Bruhus, S.: Der Wasserstand der Elbe der Mulde und Elster in den Jahren 1850–1863, *Zeitschrift des*  
1169 *statistischen Bureau des Königlich Sächsischen Ministerium für Innern*, 12. n. 11, s. 135–145, 1865.
- 1170 Cvrk, F.: Stavební úpravy dolního Labe do roku 1938, *Sborník z konference Labe, řeka současnosti a*  
1171 *budoucnosti*, 1994, s. 79–83, 1994
- 1172 Dannenberg, H., E.: Vom Wiener Kongress zur Elbeschiffahrtsakte. Die Entdeckung der „Freiheit  
1173 der Flussschiffahrt“ im früheren 19. Jahrhundert In Martin, A, Fischer, N. Die Elbe, über dem  
1174 Wandel eines Flusses vom Wiener Kongress (1815) bis zu Gegenwart, *Schriften zur Sächsischen*  
1175 *Geschichte und Volkskunde*, 58, 101–108, 2018.
- 1176 Delametherie, J. C.: *Journal de Physique, de Chemie, d' Historie naturele et des Arts. Tome LI.*  
1177 J. J. Fuchs, Paris, 480, 1800.
- 1178 Eddy, A.: The Maunder minimum. *Science* 192, 1189–1202, 1976.
- 1179 Elbeströmbauverwaltung: *Der Elbestrom sein Stromgebiet und seine wichtigsten Nebenflüsse*, Berlin,  
1180 I.- III., Verlag von Dietrich Reimer, Berlin, 1898.
- 1181 Elbekarte: Poříční mapa Vltavy a Labe z Prahy do Hřenska, *Mapová sbírka Státního Archivu,*  
1182 *Chodovec, inv. č. 559, sign. DX. 2. 1848.*
- 1183 Elleder, L. Andreas Rudolf Harlacher - zakladatel systematické hydrologie v Čechách, *Meteorologické*  
1184 *zprávy*, roč. 65, č. 1 s. 1 – 12. ISSN 0026-1173, 2012.

- 1185 Elleder, L.: Historical changes in frequency of extreme floods in Prague. *Hydrol. Earth Syst. Sci.*, 19,  
1186 4307-4315, 2015.
- 1187 Elleder, L. Proxydata v hydrologii-Řada pražských průtokových kulminací 1118-1825, ČHMÚ Praha,  
1188 103 s. ISBN 978-80-87577-44-8, 2016a.
- 1189 Elleder, L.: The Hunger stones: a new source for more objective identification of historical droughts,  
1190 EGU General assembly, Vienna, Austria, 17–22 April 2016, EGU2016-14986, 2016b.  
1191
- 1192 Elleder, L., Vlnas, R., Daňhelka, J., Ebeling, P., Z., Dragoun, Z.: Sucho v r. 1874 a jeho širší  
1193 souvislosti in Daňhelka, J. a Elleder L., ed. 2018. Vybrané kapitoly z historie povodní a hydrologické  
1194 služby na území ČR II., ČHMÚ Praha, 2019, under review.
- 1195
- 1196 Fügner, D., Schirpke, H. Neue Ergebnisse der Hochwasserberechnung für den Elbestrom in Dresden,  
1197 *Wasserwirtschaft-Wasstechnik* 8, s. 189–191, 1984.
- 1198 Fügner, D.: Die historische Entwicklung des hydrologischen Messwesens in Sachsen. Sonderdruck  
1199 gewässerkundliche Mitteilungen, Heft 5/ 6. s. 156–160, 1990.
- 1200 Hanel, M., Rakovec, O., Markonis, Y., Máca, P., Samaniego, L., Kyselý, J., Kumar, R. Revisiting the  
1201 recent European droughts from a long-term perspective. *Scientific Reports* 8, 9499 11, 2018.
- 1202 Harlacher A. R.: Bestimmung der Wassermenge von Flüssen etc., *Technische Blätter Zur*  
1203 *Hydrographie Böhmens* III. roč, 1871, Deutsche Polytechnische Verein, s. 137–184, 1871.
- 1204 Harlacher A. R.: Zur Hydrographie Böhmens, *Technische Blätter* III., 1871 Deutsche Polytechnische  
1205 Verein, s. 81–112, 1872.
- 1206 Harlacher A. R.: Hydrometrické práce na Labi u Děčína, *Hydrografická komise království českého,*  
1207 *vodoměrný odbor, čís. VII. Nákladem Hydrografické komise, Praha, 23, 1883.*
- 1208 Harlacher, A. R.: Hydrometrické práce na Labi u Děčína. (Hydrometric measurements in Elbe River  
1209 by Děčín), *Hydrografická komise království českého, Praha, 24, 1883.*
- 1210 Hofmann, F. W.: *Chronik der Stadt Magdeburg. Dritter Band.* Verlag Emil Baensch, Magdeburg, 555,  
1211 1850.
- 1212 Jenč, P., Peša, V., Barus, M.: Dokumentace skalních rytin, nápisů a dalších prvků historické krajiny v  
1213 CHKO Český ráj, část Maloskalská Drábovna a Besedické skály – Kalich. Zpráva pro Geopark Český  
1214 ráj o. p. s., Vlastivědné muzeum a galerie v České Lípě a Správa CHKO Český ráj Turnov, 2008
- 1215 Faulhaber, P.: Veränderung hydraulisch-morphologischer Parameter der Elbe, *Mitteilungsblatt der*  
1216 *Bundesanstalt für Wasserbau*, 82, <https://izw.baw.de/publikationen/mitteilungsblaetter/0/faulhaber.pdf>,  
1217 2000
- 1218 Faulhaber, P.: Niedrigwasserereignisse an der Elbe und ihre Bedeutung für den Ausbau des Flusses,  
1219 Bundesanstalt für Gewässerkunde Veranstaltungen 1,  
1220 [https://www.bafg.de/DE/05\\_Wissen/04\\_Pub/03\\_Veranst/201301.pdf](https://www.bafg.de/DE/05_Wissen/04_Pub/03_Veranst/201301.pdf), 2013
- 1221 Focke, F.: Aus dem ältesten Geschichts-Gebiete Deutsch-Böhmens. Eine geschichtliche  
1222 Durchforschung des Elbe- und Eulau-Thales sammt Umgebung (and der sächsischen Gränze) von  
1223 frühester Zeit bis in die Gegenwart. II. Band. Im Selbstverlage des Verfassers, Varnsdorf, 410, 1879.
- 1224 Frölich – Schauseil, A.: Von Schandau in der Sächsischen Schweiz bis zur Sandbänken in der  
1225 Nordsee In Martin, A, Fischer, N.: Die Elbe, über dem Wandel eines Flusses vom Wiener Kongress  
1226 (1815) bis zu Gegenwart, *Schriften zur Sächsischen Geschichte und Volkskunde*, 58, 205–225, 2018.

- 1227 Krolmus, V. 1845. Kronyka čili dějepis všech povodní posloupných let, suchých i mokrých, úrodných  
1228 a neúrodných na obilí, ovoce a vína, hladů, morů a jiných pohrom v Království Českém. Tiskem Karla  
1229 Wetterla, Praha, 261 s.
- 1230 Mikšovský, J., Brázdil, R., Trnka, M., and Pišoft, P.: Long-term variability of drought indices in the  
1231 Czech Lands and effects of external forcings and large-scale climate variability modes, *Clim. Past*, 15,  
1232 827-847, <https://doi.org/10.5194/cp-15-827-2019>, 2019.
- 1233 Merian, M. *Topographia Palatinus Rheni et Vicinarum Regionum*. 105, 1645.
- 1234 Novotný, J: Dvě stoleté hydrologické řady průtokové na českých řekách. Sborník prací  
1235 Hydrometeorologického ústavu Československé socialistické republiky, 2, Praha, 116, 1963.
- 1236 Neue Schriften: Neue Schriften der Kaiserl., Königl. Patriotischen ökonomischen Gesellschaft im  
1237 Königreich Böhmen, 9, 1, 1845.
- 1238 Old hydrometry: The archive of old hydrometric measurements by hydrological service in Prague in  
1239 1877-1940 years, *Archive of CHMI*, manuscript, 1877-1940.
- 1240 Pažourek, V.: Lodní doprava a hladový kámen v Děčíně, *Děčín vlastivědné zprávy 2-IV*, s. 45-52,  
1241 1995.
- 1242 Pekař, J.: *Kniha o Kostí*, ISBN 80-902353-3-6, 367, 1998.
- 1243 Pfister, Ch., 2006: Überschwemmungen und Niedrigwasser im Einzugsgebiet des Rheins 1500-2000.  
1244 *Der Rhein- Lebensadereiner Region*, Bern, s.265–273.
- 1245 Pötzsch, C. G.: *Chronologische Geschichte der grossen Wasserfluthen des Elbstroms*. Walther,  
1246 Dresden, 232 s, 1784.
- 1247 Protokoll: Protokoll der von den hohen Elbeuferstaaten abgeordneten, in eine Kommission vereinigten  
1248 Wasserbauverständigen zur Erledigung der vorkommenden hydrotechnischen Fragen der in Folge  
1249 Artikel XXX. der Elbeschiffahrtacte in Dresden versammelten den Revisions- Kommission, Dresden,  
1250 267, 1842.
- 1251 Protokoll. Verhandlungen Elbestromschau Commission der betreffenden Uferstaaten über die  
1252 Schifbarkeit der Elbe und deren Verbesserung. Hamburg, 167 p, 1850.
- 1253 Protokoll. Verhandlungen Elbestromschau Commission der betreffenden Uferstaaten über die  
1254 Schifbarkeit der Elbe und deren Verbesserung. Hamburg, 101, 1850.
- 1255 Randák, P.: Hladové kameny Dolní Žleb & Těchlovice, Povodí Labe, státní podnik,  
1256 závod Roudnice nad Labem, (<http://www.pla.cz/>), 20, 2015.
- 1257 Randák, P.: 2017a. Hladové kameny v Dolním Žlebu a Těchlovicích in *Minulostí Českého Švýcarska*  
1258 IX. P. 5-17, 2017a.
- 1259 Randák, P.: 2017b. Hladové kameny Hřensko, Povodí Labe, státní podnik závod Roudnice nad  
1260 Labem, (<http://www.pla.cz/>), 19, 2017b.
- 1261 Reuter: Die Abnahme des Wasserstandes der Flüsse und die Versandung ihrer Betten hängen von der  
1262 Verminderung und zu starken Lichtung der Gebürgswaldungen ab., *Zeitschrift für das Forst und*  
1263 *Jagdwesen mit besondere Rücksicht auf Bayern*, 11 Band, 2. Heft, 28-87, 1840.

- 1264 Schattkowsky, M. : Die Familie von Büнау: Adelherrschaften in Sachsen und Böhmen vom  
1265 Mittelalter bis zur Neuzeit, Leipzig, 532, 2003.
- 1266 Shanin, M. M. A. Hydrology of the Nile Basin, Amsterdam, New York, Oxford, Tokyo 574, 1985.
- 1267 Schulte, L., Schillereff, D., Santisteban, J. I.: Pluridisciplinary analysis and multi-archive  
1268 reconstruction of paleofloods: Societal demand, challenges and progress, *Gloplacha*, 177, 225–238.
- 1269 SLČ: Staří letopisové čeští od roku 1378 do 1527, čili pokračování v kronikách Přibíka Pulkavy a  
1270 Beneše z Hořovic z rukopisů starých vydané, Ed. Palacký, 1941.
- 1271 Ursinus, J. F.: *Collektania zur Geschichte der Stadt und des Landes Meißen*, 1790.
- 1272 Van Loon, A. F.: Hydrological drought explained, *WIREs Water* 2015, 2:359–392. doi:  
1273 10.1002/wat2.1085, 2015.
- 1274 Velímský, T.: Město na louce: archeologický výzkum na Mariánské louce v Děčíně 1984-1989. I.  
1275 vyd. Děčín: Okresní muzeum, 1991. 54 s. ISBN 80-85036-05-3, 1991.
- 1276 Walter, H.: Über die Stromschnelle von Laufenburg. Diss. Phil. II, Zürich, Switzerland, 1901.
- 1277 Walther, P., Büttig S., Kaltofen, A., Kaden, M., Lange J. M.: Erfassung der Hungersteine in der Elbe,  
1278 Sächsische Landesamt für Umwelt, Landwirtschaft und Geologie, Archäologische Gesellschaft in  
1279 Sachsen, Senckenberg Naturhistorische Sammlungen Dresden,  
1280 [https://www.thueringen.de/mam/th8/tlug/content/abt\\_1/v\\_material/2019/lange\\_hungersteine\\_untiefen.](https://www.thueringen.de/mam/th8/tlug/content/abt_1/v_material/2019/lange_hungersteine_untiefen.pdf)  
1281 pdf, 2018.
- 1282 Wetter O., Pfister Chr., Werner, J., P., Zorita, E., Wagner, S., et al.: The year-long unprecedented  
1283 European heat and drought of 1540 – a worst case”, *Climate Change*, 125, 2014, 349-363.  
1284
- 1285 Weikinn, C.: Quellentexte zur Witterungsgeschichte Europas von der Zeitwende bis zum Jahr 1850, I.  
1286 (*Hydrgraphie (1751-1800)*), ed. Bömgen, M., 673, 2000.
- 1287 Wex, G.: Ueber die Wasserabnahme in den Quellen, Flüssen und Strömen, *Zeitschrift des*  
1288 *Oesterreichischen Ingenieur und Architekten Vereins*, vol. 25, n.4, S. 63- 76, 1873.
- 1289 Wilhelm B., Ballesteros Cánovas J.A., Macdonald N., et al.: . Interpreting historical, botanical, and  
1290 geological evidence to aid preparations for future floods, *WIREs Water*. 2019;6:e1318.  
1291 <https://doi.org/10.1002/wat2.1318>
- 1292 Witmann, J.: *Chronik der niedrigsten Wasserstände der Rhein*, Seifert, Mainz, 142, 1859.
- 1293 Wiesenfeld, K. : *Andenken an der dritte Versammlung deutschen Architekten und Ingenieure in Prag,*  
1294 *im Jahre 1844*, *Allgemeine Bauzeitung*, 251–261, 1844.
- 1295
